# 1 Acquisition of ionic copper by a bacterial outer membrane protein

2

3

4 Satya Prathyusha Bhamidimarri<sup>1</sup>, Tessa R. Young<sup>2</sup>, Muralidharan Shanmugam<sup>3</sup>, Sandra  
5 Soderholm<sup>4</sup>, Arnaud Baslé<sup>1</sup>, Dirk Bumann<sup>4</sup>, Bert van den Berg<sup>1#</sup>

6

7

8

9 <sup>1</sup>Biosciences Institute, The Medical School, Newcastle University, Newcastle upon Tyne NE2  
10 4HH, UK

11

12 <sup>2</sup>Department of Biosciences, Durham University, DH1 3LE Durham, UK.

13

14 <sup>3</sup> Photon Science Institute and Manchester Institute of Biotechnology, University of  
15 Manchester, Oxford Road, Manchester M13 9PL, UK

16

17 <sup>4</sup> Focal Area Infection Biology, University of Basel, CH-4056 Basel, Switzerland

18

19

20 # Corresponding author: bert.van-den-berg@ncl.ac.uk

21

22 **Classification:** Biological Sciences; Biochemistry

23 Biological Sciences; Microbiology

24

25 **Keywords:** TonB dependent transporters, OprC, copper, *Pseudomonas aeruginosa*,  
26 membrane proteins.

27

28

29

30

31

32

33

## 34 **Abstract**

35 Copper, while toxic in excess, is an essential micronutrient in all kingdoms of life due to its  
36 essential role in the structure and function of many proteins. Proteins mediating ionic copper  
37 import have been characterised in detail for eukaryotes, but much less so for prokaryotes. In  
38 particular, it is still unclear whether and how Gram-negative bacteria acquire ionic copper.  
39 Here we show that *Pseudomonas aeruginosa* OprC is an outer membrane, TonB-dependent  
40 transporter that is conserved in many Proteobacteria and which mediates acquisition of both  
41 reduced and oxidised ionic copper via an unprecedented CxxxM-HxM metal binding site.  
42 Crystal structures of wild type and mutant OprC variants with silver and copper suggest that  
43 acquisition of Cu(I) occurs via a surface-exposed "methionine track" leading towards the  
44 principal metal binding site. Together with whole-cell copper quantitation and quantitative  
45 proteomics in a murine lung infection model, our data identify OprC as an abundant  
46 component of bacterial copper biology that may enable copper acquisition under a wide range  
47 of conditions.

## 48 **Significance**

49 Copper is an essential metal in biology due to its role in the structure and function of many  
50 proteins. Despite this, it is not very clear how bacteria acquire copper, especially for Gram-  
51 negative organisms. In this study we show that the outer membrane protein OprC has an  
52 unusual metal binding site that allows OprC to bind both reduced and oxidised ionic copper  
53 near-irreversibly. Given the versatility of OprC, its presence in many Proteobacteria and its  
54 abundance during lung infection in mice, our study shows that OprC is an important  
55 component of prokaryote copper biology that warrants further study to uncover its regulation  
56 and to assess its role in bacterial virulence.

## 57 **Introduction**

58 Metals fulfil cellular functions that cannot be met by organic molecules and are indispensable  
59 for the biochemistry of life in all organisms. Copper is the third-most abundant transition metal  
60 in biological systems after iron and zinc. It has key roles as structural component of proteins  
61 or catalytic cofactor for enzymes(1) , most notably associated with the biology of oxygen and  
62 in electron transfer. On the other hand, an excess of copper can be deleterious due to its  
63 ability to catalyse production of hydroxyl radicals(2, 3). Excessive copper may also disrupt  
64 protein structure by interaction with the polypeptide backbone, or via replacement of native  
65 metal cofactors from proteins, thus abolishing enzymatic activities via mismetallation (1, 4, 5).  
66 Thus, cellular copper levels and availability must be tightly controlled. Bacterial copper  
67  
68

69 homeostasis systems are well characterised(6). Specific protein machineries are involved in  
70 fine-tuning the balance of intracellular copper trafficking, storage and efflux according to  
71 cellular requirement, in such a way that copper is always bound. This control is executed by  
72 periplasmic and cytosolic metalloregulators, which activate transcription of periplasmic multi-  
73 copper oxidases, metallochaperones, copper-sequestering proteins(7, 8) and transporters(9-  
74 11). To date, relatively few families of integral membrane proteins have been validated as  
75 copper transporters, and these have different structures and transport mechanisms(12). The  
76 P<sub>1B</sub>-type ATPases such as CopA are responsible for Cu(I) efflux from the cytosol via several  
77 metal binding domains, using energy released from ATP hydrolysis (13-15). A second class  
78 of copper export proteins are RND-type tripartite pumps such as CusABC, which efflux Cu(I)  
79 by utilising the proton-motive force(16-18). Relatively few copper influx proteins have been  
80 identified. The bacterial inner membrane copper importer CcoA is a major facilitator  
81 superfamily (MFS)-type transporter involved in fine-tuning the trafficking of copper into the  
82 cytosol and required for cytochrome c oxidase maturation(19, 20). The Ctr family of copper  
83 transporters is responsible for Cu(I) translocation into the cell without requiring external  
84 sources of energy(21). However, Ctr homologs are found only in eukaryotes, and the  
85 molecular mechanisms by which copper ions enter Gram-negative bacteria is still a matter of  
86 debate. The exception is copper import via metallophores like methanobactin, a small Cu-  
87 chelating molecule that is secreted by methanotropic bacteria and most likely taken up via  
88 TonB-dependent transporters, analogous to iron-siderophores(22).

89  
90 *Pseudomonas aeruginosa* is a versatile and ubiquitous Gram-negative bacterium and a  
91 notorious opportunistic pathogen in humans, playing a major role in the development of  
92 chronic lung infection in cystic fibrosis patients(23, 24). *P. aeruginosa* has a number of TonB-  
93 dependent transporters (TBDTs) in the outer membrane (OM) dedicated to the acquisition of  
94 different iron-siderophore complexes such as pyochelin and pyoverdinin(25). In addition, *P.*  
95 *aeruginosa* contains another TBDT, termed OprC (*PA3790*), whose function has remained  
96 enigmatic. Nakae *et al.* suggested that OprC binds Cu(II) with micromolar affinities(26).  
97 Transcription of OprC was found to be repressed in the presence of Cu(II) in the external  
98 medium under aerobic conditions(26-29), suggesting a role for OprC in copper acquisition.  
99 Very recently, the blue copper protein azurin was reported to be secreted by a *P. aeruginosa*  
100 Type VI secretion system and to interact with OprC, suggesting a role of the latter in Cu(II)  
101 uptake(29).

102  
103 To clarify the role of OprC in copper biology, we have determined X-ray crystal structures of  
104 wild type and mutant OprC proteins in the absence and presence of copper and silver, and

105 characterised metal binding via ICP-MS and EPR. In addition, we have confirmed metal  
106 uptake by OprC using whole cell metal quantitation. OprC indeed has the typical structure of  
107 a TBDT, and differences between the Cu-loaded and Cu-free protein demonstrate changes in  
108 tertiary structure that likely lead to TonB interaction and copper import.

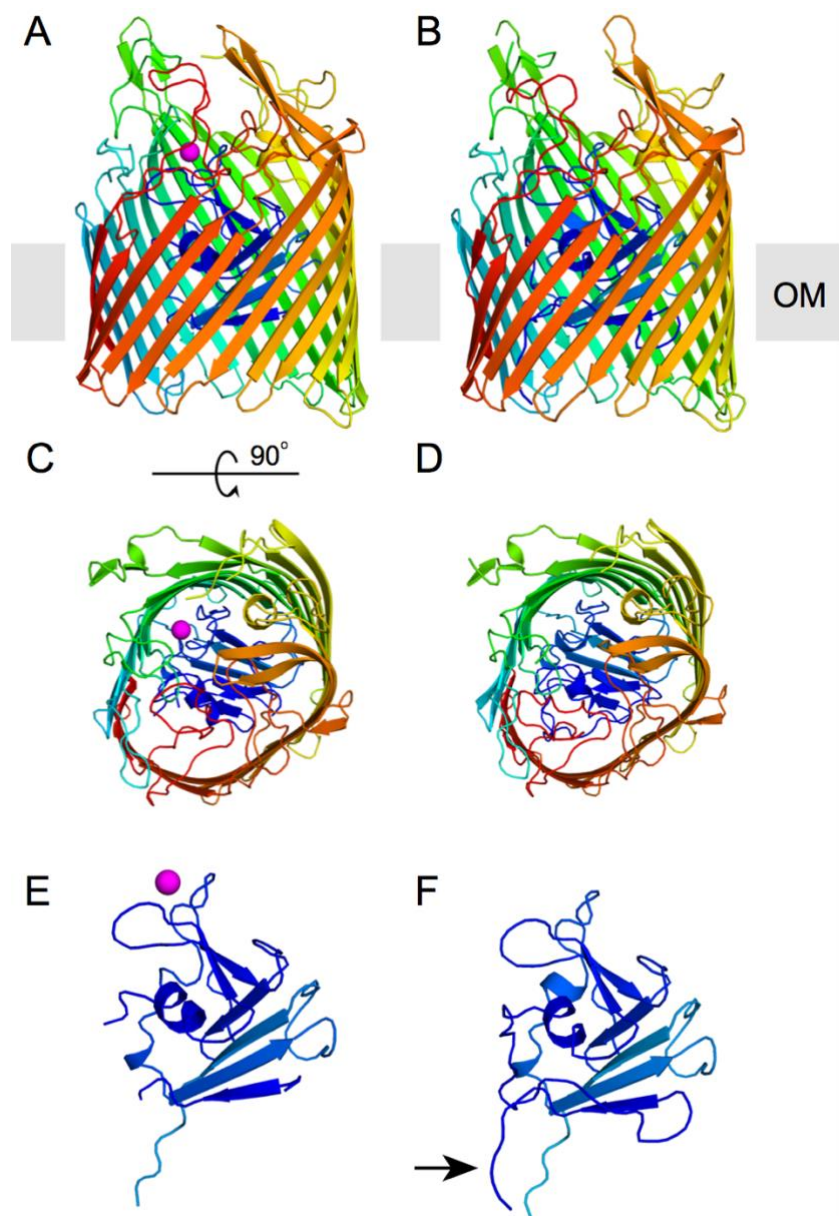

109  
110 Figure 1. OprC is a TonB-dependent transporter. Cartoon representation of (A,C) Cu-loaded  
111 OprC and (B,D) Cu-free OprC (OprC<sub>AA</sub>). The N-terminal plug domain is shown separately for  
112 both forms (E,F). Structures are shown in rainbow from N-terminus (blue) to C-terminus (red);  
113 copper is represented as a magenta sphere. The arrow in (F) highlights the visibility of the Ton  
114 box in apo-OprC.

115  
116  
117

## 118 **Results**

### 119 **OprC is a TonB-dependent transporter that binds ionic copper.**

120 The structure of OprC, crystallised with an N-terminal His7 purification tag under aerobic  
121 conditions in the presence of 2 mM CuCl<sub>2</sub>, was solved using single wavelength anomalous  
122 dispersion (Cu-SAD), using data to 2.0 Å resolution (Methods; Table S1; Fig. S1). As indicated  
123 by the successful structure solution, OprC contains a single bound copper and shows the  
124 typical fold of a TBDT, with a large 22-stranded β-barrel occluded by an N-terminal ~15 kDa  
125 plug domain (Fig. 1). The copper binding site comprises residues Cys143 and Met147 in the  
126 plug domain and His323 and Met325 in the barrel wall. The CxxxM-HxM configuration, which  
127 coordinates the copper in a tetrahedral manner (Fig. 2A, B), is highly unusual and has, to our  
128 knowledge, not been observed before in copper homeostasis proteins. A similar site is present  
129 for one of the copper ions of the valence-delocalised Cu<sub>A</sub> dimer in cytochrome c oxidase,  
130 where the copper ion is coordinated by 2Cys+1Met+1His(30, 31). Other similar sites are class  
131 I Type I copper proteins like pseudoazurin and plastocyanin, where copper is coordinated by  
132 2His+1Cys+1Met(32). Interestingly, and unlike class I Type I copper proteins, concentrated  
133 solutions and OprC crystals obtained in the presence of Cu (II) are colourless. Another notable  
134 feature of the OprC structure becomes apparent when analysing the positions of the  
135 methionine residues. As shown in Fig. 2D, out of the 15 visible methionines in OprC, 10 are  
136 organised in such a way that they form a distinct "track" leading from the extracellular surface  
137 towards the copper binding site. An additional two methionines (Met448, Met558) are not  
138 visible due to loop disorder, but given their positions they will be a part of the methionine track.  
139 Considering that Cu(II) prefers nitrogen and oxygen as ligands while Cu(I) prefers sulphur, we  
140 propose that the methionine track might bind Cu(I) with low affinity and may guide the metal  
141 towards the principal binding site, which is at the bottom of the track (Fig. 2D). Importantly, the  
142 anomalous difference maps of OprC crystallised with Cu(II) do not show any evidence for  
143 weaker, secondary copper sites (Fig. S1), demonstrating that there are no other copper  
144 binding sites and that the methionine track indeed does not bind Cu(II).

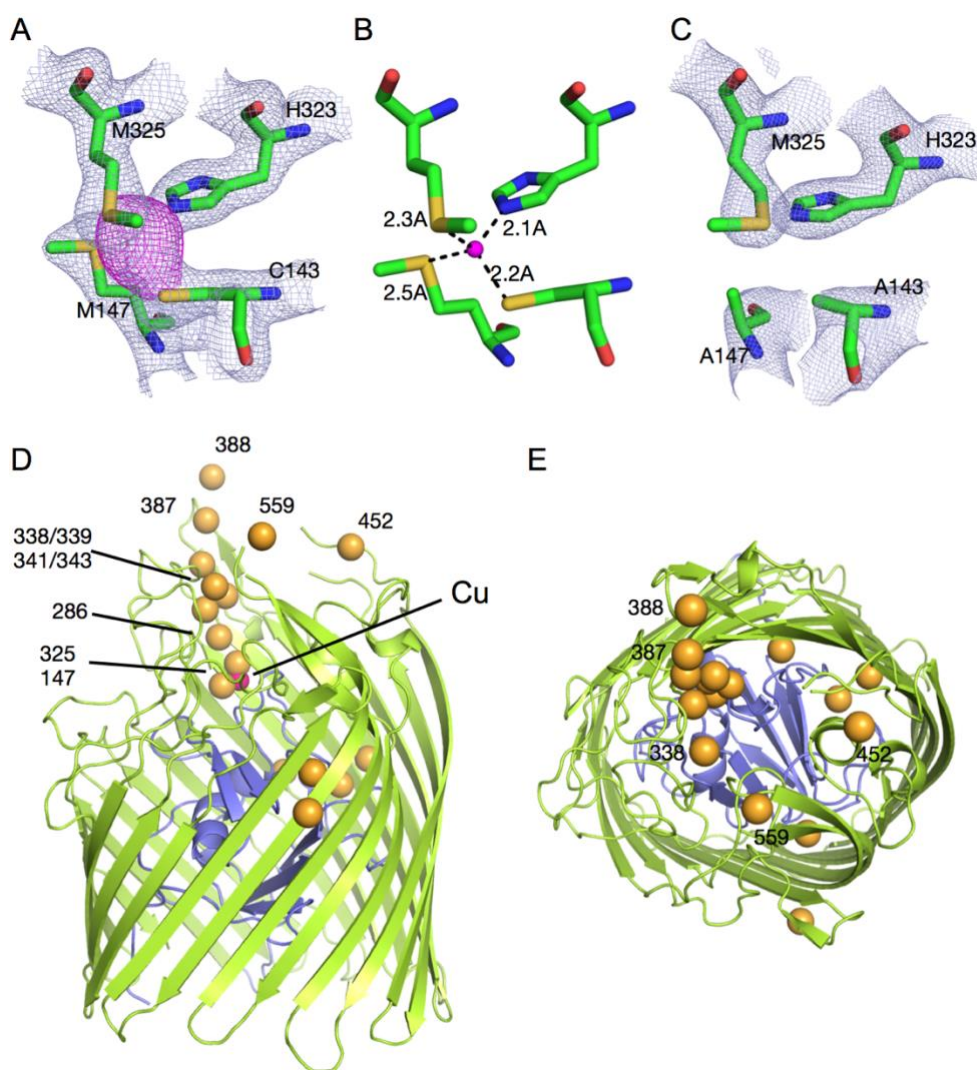

145

146 Figure 2. OprC has an unusual CxxxM-HxM binding site and a methionine binding track. (A),  
147 Stick models of copper-coordinating residues Cys143, Met147, Met325 and His323. Electron  
148 density in gray mesh (2Fo-Fc map contoured at  $2.0\sigma$ , carve = 2.0) is shown for the binding  
149 site residues C/M-H/M and the copper atom (anomalous difference map shown in magenta,  
150 contoured at  $3.0\sigma$ , carve = 2.25). (B) Distances between coordinating residues and metal  
151 show that copper is coordinated via 1 thiolate (from Cys), two thioethers (from Met), and one  
152 imidazole nitrogen from His. (C) Mutation of binding site residues Cys143 and Met147 to  
153 alanines abolishes copper binding (2Fo-Fc map contoured at  $2.0\sigma$ , carve = 2.0). (D,E) OM  
154 plane (D) and extracellular views (E) showing the thioether atoms of all methionine residues  
155 present in OprC as yellow spheres. The copper atom, only visible in (D), is shown as a  
156 magenta sphere.

157

### 158 **Copper binding by OprC is highly specific and near-irreversible.**

159 Following structure determination of copper-bound OprC, several attempts were made to  
160 produce a structure of copper-free OprC. First, the protein was purified and crystallised without  
161 added copper; however, this gave a structure that was identical to the one already obtained  
162 and contained bound copper that presumably originated from the LB medium. As expression  
163 in rich media always yielded OprC with 0.5-0.8 equivalents copper as judged by ICP-MS,

164 various attempts to lower the copper content were made. Removal of bound copper from  
165 purified protein with combinations of denaturants (up to 4.0 M urea) and EDTA were not  
166 successful. Expression in minimal medium reduced, in the best cases, the metal content of  
167 the wild type to ~45 % equivalency (Figs. 3A, B). Subsequent aerobic incubation of OprC for  
168 30 min in the presence of either 3 or 10 equivalents Cu(II) followed by size exclusion  
169 chromatography (SEC) in buffer containing 0.5 mM EDTA demonstrate co-elution of 1  
170 equivalent copper (Fig. 3B). Thus, the His7 tag does not bind Cu(II) with high affinity. Co-  
171 incubation with 0.5 mM EDTA (~50-fold excess) does not result in copper loading, suggesting  
172 that EDTA effectively withholds Cu (II) from OprC (Fig. S2). As-purified OprC does not contain  
173 zinc, the most common contaminant in metal-binding proteins, nor does it contain appreciable  
174 amounts of any other metals that could have been introduced during purification such as Ni  
175 and Fe, indicating that OprC is highly specific (Fig. 3A, Fig. S2). Indeed, incubation of purified  
176 OprC in the presence of 3 or 10 equivalents Zn does not result in zinc co-elution (Fig. S2). To  
177 obtain copper-free OprC after purification from rich media, we constructed a variant (OprC<sub>AA</sub>)  
178 in which the binding site residues Cys143 and Met147 were both mutated to alanines (Fig. 3A;  
179 AA). Even after equilibration of OprC<sub>AA</sub> for 30 min with 3 or 10 equivalents Cu (II) no co-elution  
180 with metal is observed (Fig. 3B), indicating that high-affinity copper binding is completely  
181 abolished and confirming that the His7 tag does not bind Cu(II) with an affinity high enough to  
182 survive SEC, possibly due to the presence of 0.5 mM EDTA in the SEC buffer.  
183

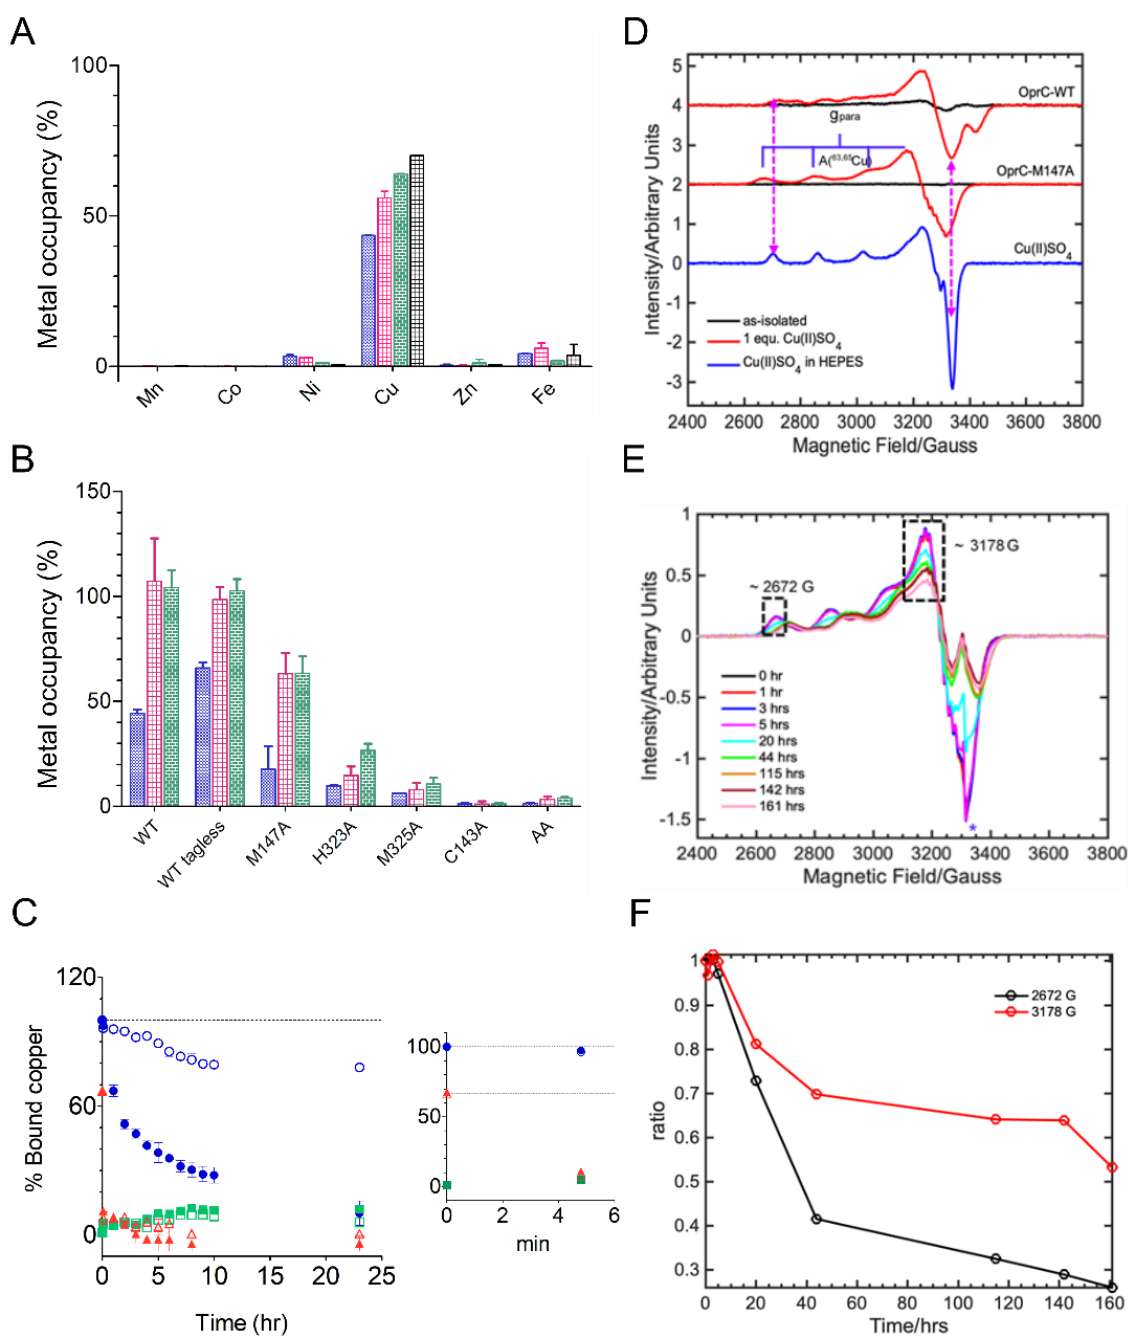

184

185 Figure 3. OprC binds 1 equivalent copper near-irreversibly. (A) Metal occupancy of as-purified  
 186 wild type OprC by ICP-MS shows specific binding only to copper. Each colour indicates an  
 187 individual batch of purified protein. Averages  $\pm$  s.d are shown (3 technical replicates) (B)  
 188 Copper content of wild type OprC and binding site mutant proteins before (blue) and after  
 189 aerobic incubation with either 3 (pink) or 10 (green) equivalents Cu(II) for 30 min followed by  
 190 analytical SEC. All proteins except where stated contain a N-terminal His7 tag. Averages  $\pm$   
 191 s.d. of three or four incubations from one or two different protein batches are shown (n = 3 or  
 192 4) (C) Copper is kinetically trapped in OprC. Time course of copper extraction experiments  
 193 showing % bound copper for OprC WT (blue), OprC<sub>AA</sub> (green) and OprC M147A (red), at room  
 194 temperature (open symbols) and 60 °C (filled symbols). The inset shows % bound copper in  
 195 the first few minutes after starting the experiment. OprC<sub>AA</sub> served as a control. Dotted lines  
 196 indicate initial occupancies of OprC WT and M147A. (D) Comparison of the cw-EPR spectra  
 197 of OprC<sub>WT</sub> and OprC<sub>M147A</sub> mutant before (black traces) and after (red traces) addition of Cu(II)



198 solution to 1 equivalent. The blue trace shows the EPR spectrum of the Cu(II)SO<sub>4</sub> in Hepes  
199 buffer. All EPR spectra have been background subtracted. The double-headed magenta  
200 dotted arrows show the difference in the observed **g** and **A** tensors of OprC variants. The blue  
201 goal-posts indicate the <sup>63,65</sup>Cu-hyperfine splitting along the parallel region. Before Cu(II)  
202 addition, the copper equivalencies were 0.6 for OprC<sub>WT</sub> and 0.1 for OprC<sub>M147A</sub>. (E) EPR time  
203 course for OprC<sub>M147A</sub> after addition of 1 equivalent Cu (II). (F) Relative intensities of EPR  
204 signals at ~ 2672 G and 3178 G (black dotted rectangular boxes in the top panel) plotted as a  
205 function of time. Values shown are averages from three independent time courses.  
206

207 The fact that it is not possible to obtain copper-free wild type protein, even after taking  
208 extensive precautions, suggests that copper binds to OprC with very high affinity. To explore  
209 this further, we performed copper extraction assays with a large excess of  
210 bathocuproinedisulfonic acid (BCS) under reducing conditions (Methods). For copper-loaded  
211 OprC<sub>WT</sub>, only 20% copper was removed after 24 hrs at room temperature, and the temperature  
212 had to be increased to 60 °C to obtain near-quantitative extraction of copper (~90% after 24  
213 hours) (Fig. 3C). For reasons that are unclear, the orange-coloured [Cu(BCS)<sub>2</sub>]<sup>3-</sup> complex was  
214 hard to separate from OprC, and BCS-treated OprC did not bind copper anymore, suggesting  
215 an irreversible change in the protein due to the harsh incubation conditions. Nevertheless,  
216 these results demonstrate that copper is kinetically trapped inside OprC and is, for all intents  
217 and purposes, irreversibly bound. This is fully compatible with the consensus transport  
218 mechanism of TBDTs, in which the interaction with TonB, occurring after substrate binding, is  
219 required to disrupt the binding site, leading to release of the substrate(33).  
220

### 221 **Conformational changes upon copper binding.**

222 The OprC<sub>AA</sub> structure was solved by molecular replacement using Cu-bound OprC as the  
223 search model (Figs.1 B,D,F; Fig. 2C). The binding site residues of both structures occupy very  
224 similar positions, indicating that the introduced mutations abolish copper binding without  
225 generating gross changes in the binding site. Superposition of the structures (Figs. 4 A,B)  
226 shows that for the remainder of the transporter, structural changes upon copper binding are  
227 confined to the vicinity of the copper binding site, with parts far removed virtually unchanged  
228 (overall C $\alpha$  r.m.s.d ~ 1.0 Å). The largest change is observed for loop L11, which undergoes  
229 an inward-directed motion of ~ 8.0 Å upon copper binding (Figs. 4 D,E and Fig. S3). A similar  
230 inward-directed but smaller change occurs for loop L8. Some loop tips (e.g. L4, L5, L6) in  
231 OprC<sub>AA</sub> lack electron density for a limited number of residues, suggesting increased mobility.  
232 Overall, the conformational changes of the loops upon copper binding likely decrease the  
233 accessibility of the copper binding site. However, the main reason why the bound copper is  
234 inaccessible to solvent is that the binding site residues Met147 and Met325, together with  
235 Asn145, effectively form a lid on the copper ion in the wild type transporter. In the double

236 mutant, copper becomes solvent accessible due to the absence of the Met147 side chain (Fig.  
237 4D, E and Fig. S3).

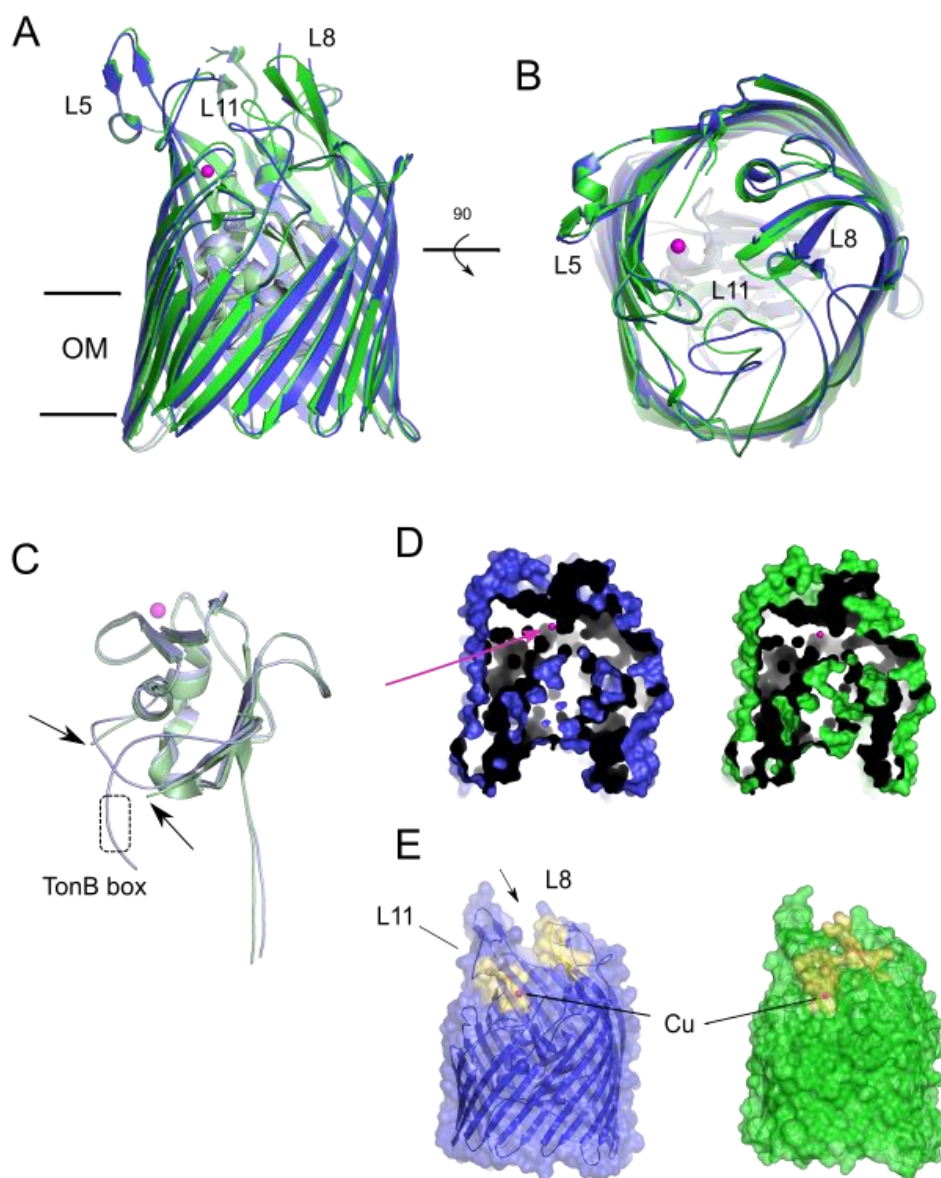

238  
239 Figure 4. OprC structural changes upon copper binding. (A,B) Cartoon superposition  
240 from the OM plane (A) and extracellular environment (B) of Opr<sub>WT</sub> (coloured green) and  
241 Opr<sub>AA</sub> (blue), indicating locations of loops L5, L8 and L11; copper is represented as a  
242 magenta sphere. The plug domains of Opr<sub>WT</sub> and Opr<sub>AA</sub> are coloured light green and light  
243 blue, respectively. (C) Superposition of N-terminal plug domains indicating the location of the  
244 TonB box, which is invisible in Cu-bound Opr<sub>WT</sub>. Arrows indicate the missing density for  
245 Glu88-Pro94 in Opr<sub>WT</sub>. (D) Surface slab representations from the OM plane, showing the  
246 presence of a solvent pocket in Opr<sub>AA</sub> that is generated by the absence of Met147 (arrow).  
247 For orientation purposes, the Opr<sub>WT</sub>-bound copper is shown in both structures. (E) Side  
248 surface views showing the conformational changes of L8 and L11 (coloured yellow) as a result  
249 of copper binding. As in (E), the bound copper of Opr<sub>WT</sub> is shown in both proteins.  
250

251 The consensus mechanism for TonB-dependent transport postulates that ligand binding on  
252 the extracellular side generates conformational changes that are propagated to the  
253 periplasmic side of the plug and increase the periplasmic accessibility of the Ton box for  
254 subsequent interaction with TonB(34). In OprC<sub>AA</sub>, N-terminal density is visible up to Leu66  
255 (*i.e.*, the first 10 residues of the mature protein are disordered) including the Ton box  
256 (<sup>68</sup>PSVVTGV<sup>75</sup>), which is tucked away against the plug domain and the barrel wall. In Cu-  
257 OprC, the density between Glu88 and Pro94 is hard to interpret and, more importantly, no  
258 density is observed before Pro79, including the Ton box (Figs. 1 E,F and 4 C). Thus, while we  
259 cannot say conclusively that the Ton box is accessible to TonB in Cu-OprC, the structures do  
260 show that changes occur in the Ton box upon substrate binding. Thus, the structures of OprC  
261 in the absence and presence of ligand are consistent with the consensus TBDT mechanism.  
262 The observed position of the Ton box in OprC<sub>AA</sub>, likely hard to reach from the periplasmic  
263 space, would prevent non-productive interactions of TonB with transporters that do not have  
264 substrate bound(34).

265

#### 266 **The OprC methionine track and the principal binding site bind Cu(I).**

267 We next asked whether OprC also binds Cu (I). Since it is challenging to maintain copper in  
268 its +1 state during crystallisation, we used silver (Ag(I)) as a proxy for Cu(I) and determined  
269 the co-crystal structure of WT OprC in the presence of 2 mM AgNO<sub>3</sub> (Methods). This is  
270 possible because the as-purified protein used for crystallisation only had partial copper  
271 occupancy (~60%). Data was collected at 8000 eV, at which energy the anomalous signal of  
272 copper is very small (0.6 e<sup>-</sup>, compared to 4.2 e<sup>-</sup> for Ag). Strikingly, and in sharp contrast to Cu  
273 (II) (Fig. S1), the anomalous map of OprC WT crystallised in the presence of silver shows not  
274 one but three anomalous peaks. The first, strong peak (Ag1; 23σ) is located at the same site  
275 as in OprC crystallised with Cu (II), and is coordinated by the same residues (Cys143, Met147,  
276 His323 and Met325; Fig. 5A). The other two silver sites have lower occupancies (Ag2, ~10σ  
277 and Ag3, ~10σ) and are each coordinated by two methionines of the methionine track (Met286  
278 and Met339 for Ag2; Met341 and Met343 for Ag3). While direct measurement of the affinities  
279 of the methionine binding track sites would be challenging, the structural data suggest that the  
280 methionine track provides several low-affinity binding sites for Ag(I), and, by extension, for  
281 Cu(I). Thus, while the methionine track binds Cu(I) but not Cu(II), the high affinity CxxxM-HxM  
282 site likely binds both copper redox states.

283

284 To obtain more information on the individual residue contribution to copper binding, we next  
285 generated the complete set of single alanine mutants of the principal binding site residues

286 (C143A, M147A, H323A and M325A), and determined copper binding via analytical SEC and  
287 ICP-MS. For all single mutants, the copper content after purification from LB was below 10%,  
288 except for M147A (~20 %) (Fig. 3b). Upon incubation with 3 or 10 equivalents Cu (II), various  
289 occupancies were obtained. C143A has no bound copper even after incubation with 10  
290 equivalents Cu (II), suggesting this residue has a crucial role. H323A (~30%) and in particular  
291 M147A (~60%) have relatively high occupancies after copper incubation and SEC, indicating  
292 that these residues contribute less towards binding. Of the four ligands, the M147 thioether is  
293 the furthest away from the copper in the crystal structure (Fig. 2B), which may explain why it  
294 contributes the least to ligand binding. Interestingly, removal of bound copper is much faster  
295 in the M147A mutant compared to OprC<sub>WT</sub> (Fig. 3C), suggesting that solvent exclusion by the  
296 M147 side chain (Fig. 4D) is the main reason why copper is kinetically trapped in OprC<sub>WT</sub>.

297  
298 To shed additional light on the redox state of the bound copper, continuous wave EPR (cw-  
299 EPR) spectra were recorded on OprC<sub>WT</sub>. Surprisingly, as-purified OprC<sub>WT</sub> containing ~0.6  
300 equivalents copper was EPR silent (Fig. 3D), demonstrating that the copper species present  
301 in the crystal structure is Cu(I). The as-purified M147A protein, with ~0.1 equivalent copper,  
302 was EPR silent as well. We next loaded the M147A mutant with CuSO<sub>4</sub> to 1 equivalent, and  
303 EPR spectra were recorded over time. The observed EPR signal is different from the standard  
304 CuSO<sub>4</sub> Cu (II) EPR signals, confirming that Cu(II) binds to the protein. The EPR spectra of the  
305 OprC-WT and OprC-M147A mutant show nicely resolved <sup>63,65</sup>Cu(II) hyperfine coupling along  
306 the parallel region, due to the interaction of an unpaired electron spin ( $S = \frac{1}{2}$ ) of Cu(II) with the  
307 nuclear spin of ( $I = 3/2$ ) of <sup>63,65</sup>Cu nuclei, as indicated by the blue goal-post in Fig. 3D.  
308 Interestingly, the EPR signals decrease slowly upon prolonged incubation, suggesting that  
309 bound Cu (II) is very slowly reduced to Cu(I) (Figs. 3 E,F). This, together with the possibility  
310 that OprC binds Cu(I) from the LB media, could be an explanation for the observation that as-  
311 purified OprC, expressed under aerobic conditions, contains reduced copper. However, it is  
312 clear that the observed reduction of Cu(II) is too slow to be physiologically relevant, obviating  
313 the need to find a mechanistic explanation.

314  
315

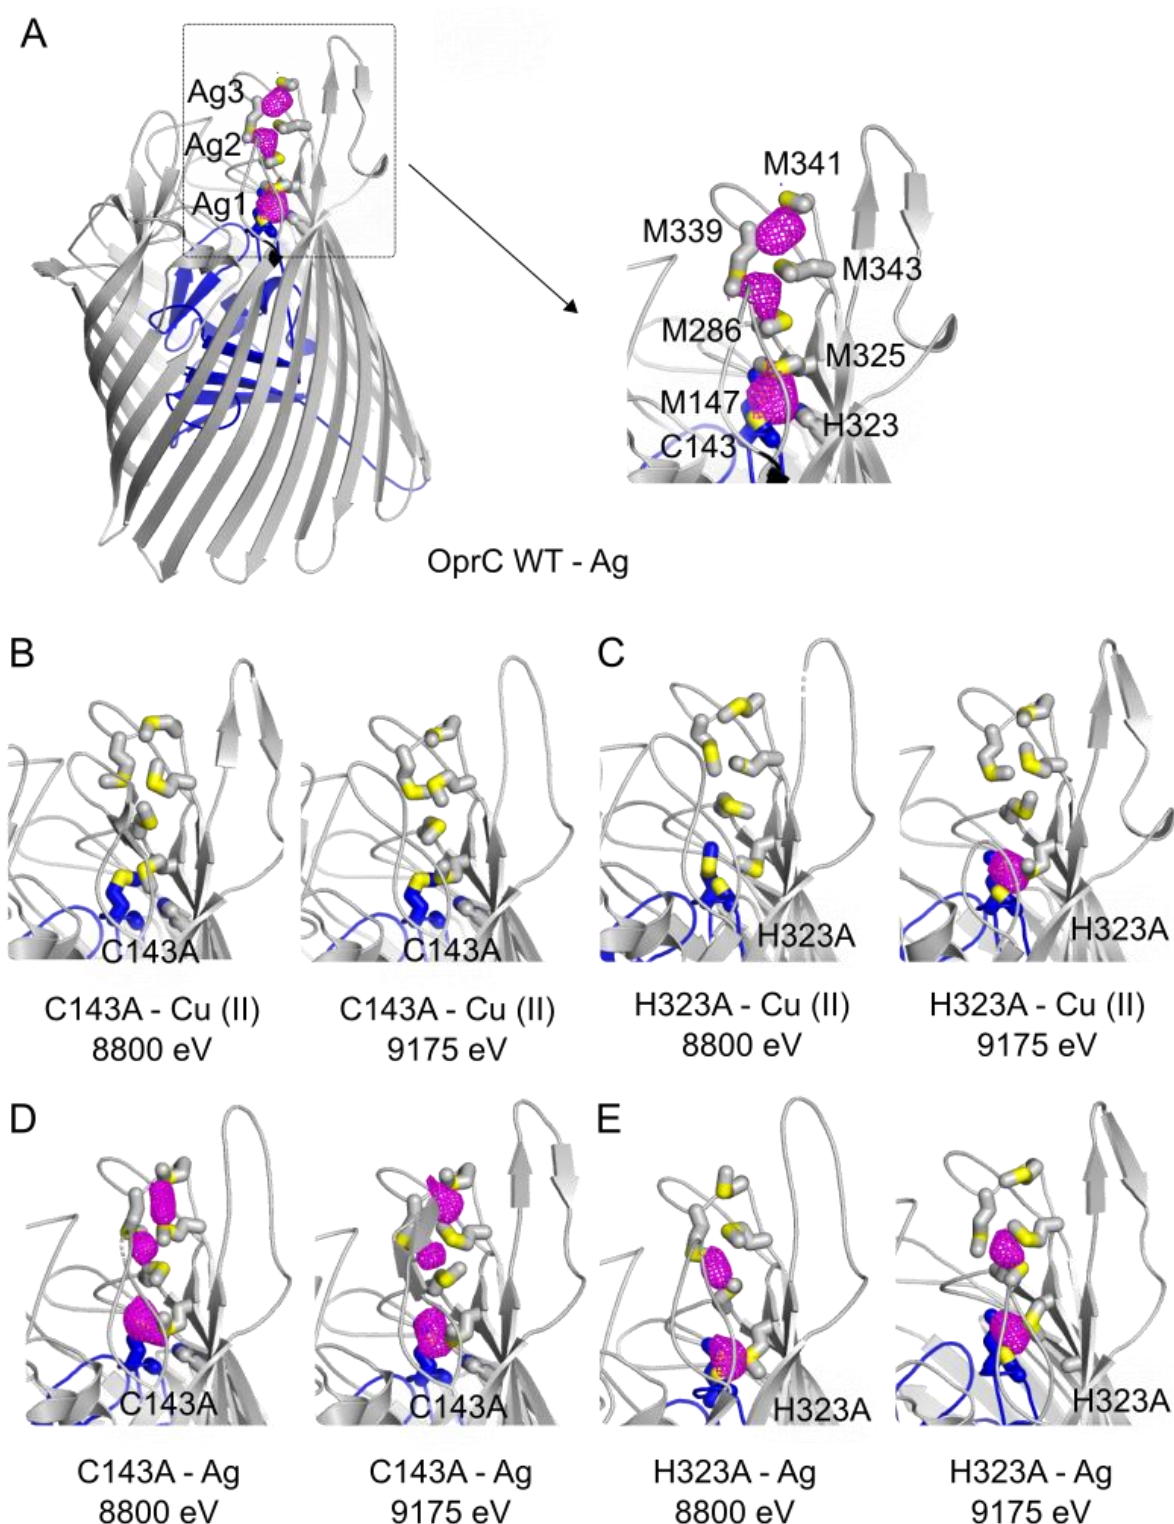

316

317 Figure 5. OprC binds Cu(I). (A-E) Anomalous difference maps of (A) OprC<sub>WT</sub>, (B,D) C143A  
 318 and (C,E) H323A variants crystallised in the presence of (A,D,E) Ag or (B,C) Cu(II), and  
 319 collected at different energies. The inset to (A) shows a close-up of the anomalous difference  
 320 peaks (magenta) near the principal binding site in OprC<sub>WT</sub>, with binding residues labelled and  
 321 represented as stick models. Sulphurs are coloured yellow. For clarity, the metal used in co-  
 322 crystallisation and the energy used for data collection are shown underneath each panel. The  
 323 OprC plug domain is coloured blue.

## 324 **Cysteine is essential for high-affinity copper Cu (II) binding.**

325 While wild type OprC and most single alanine mutants can be (partly) loaded via Cu(II)  
326 incubation, this is not the case for the C143A mutant (Fig. 3B). Given that OprC binds Cu(II),  
327 we hypothesised that removal of the cysteine might lead to much lower affinity for Cu(II), so  
328 that after SEC nothing remains bound. To test this we determined the crystal structures of the  
329 OprC C143A mutant co-crystallised with Cu (II) or silver Ag (I). For each crystal, datasets were  
330 collected at 8800 eV and 9175 eV. Bound copper is expected to give a strong anomalous peak  
331 only at 9175 eV (above the copper K edge at 8979 eV), while bound silver will give comparable  
332 peaks at both energies (silver L-III edge at 3351 eV). For C143A co-crystallised with Cu(II),  
333 no anomalous peaks are visible at both energies (Fig. 5B), showing that Cu (II) binding is  
334 indeed abolished. Crucially, in the presence of silver, the same three anomalous peaks are  
335 visible as for OprC<sub>WT</sub> (compare Figs. 5A and D), strongly suggesting that the C143A mutant  
336 can still bind Cu(I). Since Cu(II) prefers histidine nitrogen as ligands and Cu(II) binding sites  
337 often contain one or more His residues, we also co-crystallised the H323A mutant with Cu(II)  
338 and Ag(I). As shown in Fig. 5, one strong anomalous peak, at the high-affinity binding site, is  
339 observed with Cu(II), supporting the SEC data that the histidine is not required for Cu(II)  
340 binding. With Ag(I), two clear anomalous peaks are observed, suggesting that the H323A  
341 mutant can still bind Cu(I) at the principal site and at the methionine track.

342

## 343 **OprC mediates copper uptake in *P. aeruginosa***

344 To demonstrate that OprC imports copper, we performed anaerobic growth experiments in *P.*  
345 *aeruginosa* with added copper. Given that *oprC* expression is repressed with excess external  
346 Cu(II) (26-29), we employed arabinose-inducible overexpression of His-tagged *oprC* via the  
347 broad range pHERD30 plasmid(35). We complemented the PA14  $\Delta$ *oprC* strain with OprC<sub>WT</sub>  
348 and OprC<sub>AA</sub>-containing plasmids and performed growth assays in rich media with empty vector  
349 as control. Fig. S4 shows clear toxicity when OprC<sub>WT</sub> is overexpressed, even without Cu(II)  
350 addition. Surprisingly, expression of OprC<sub>AA</sub> was equally toxic as OprC<sub>WT</sub> overexpression,  
351 which indicates that the toxicity phenotype is caused by overexpression of OprC *per se*, and  
352 is not linked to copper uptake.

353

354 Since copper toxicity assays failed, we decided to determine *P. aeruginosa* whole cell metal  
355 contents using ICP-MS. We observed no differences in copper content between the wild type  
356 PA14 and  $\Delta$ *oprC* strains in rich media without added copper (Fig. S5), suggesting that OprC  
357 is not expressed under these conditions. By contrast, cells expressing OprC<sub>WT</sub> from pHERD30  
358 have more associated copper when compared to the empty vector control, under both aerobic

359 and anaerobic conditions (Fig. 6A). However, as suggested by the toxicity phenotypes  
 360 described above, this could be due to increased leakiness of cells as a result of plasmid-based  
 361 OMP expression, a possibility that was not taken into account in a recent study(29). Crucial is  
 362 therefore the result of cells expressing the OprC<sub>AA</sub> inactive mutant, showing copper levels  
 363 similar to those of the control. Moreover, OprC<sub>WT</sub> and OprC<sub>AA</sub> are present at similar levels in  
 364 the OM (Fig. 6B), demonstrating that the different amounts of copper associated with the cells  
 365 are not due to differences in protein levels. In addition, no substantial differences in cellular  
 366 metal content were detected for other divalent metals. These results firmly establish OprC as  
 367 a copper importer in *P. aeruginosa*.

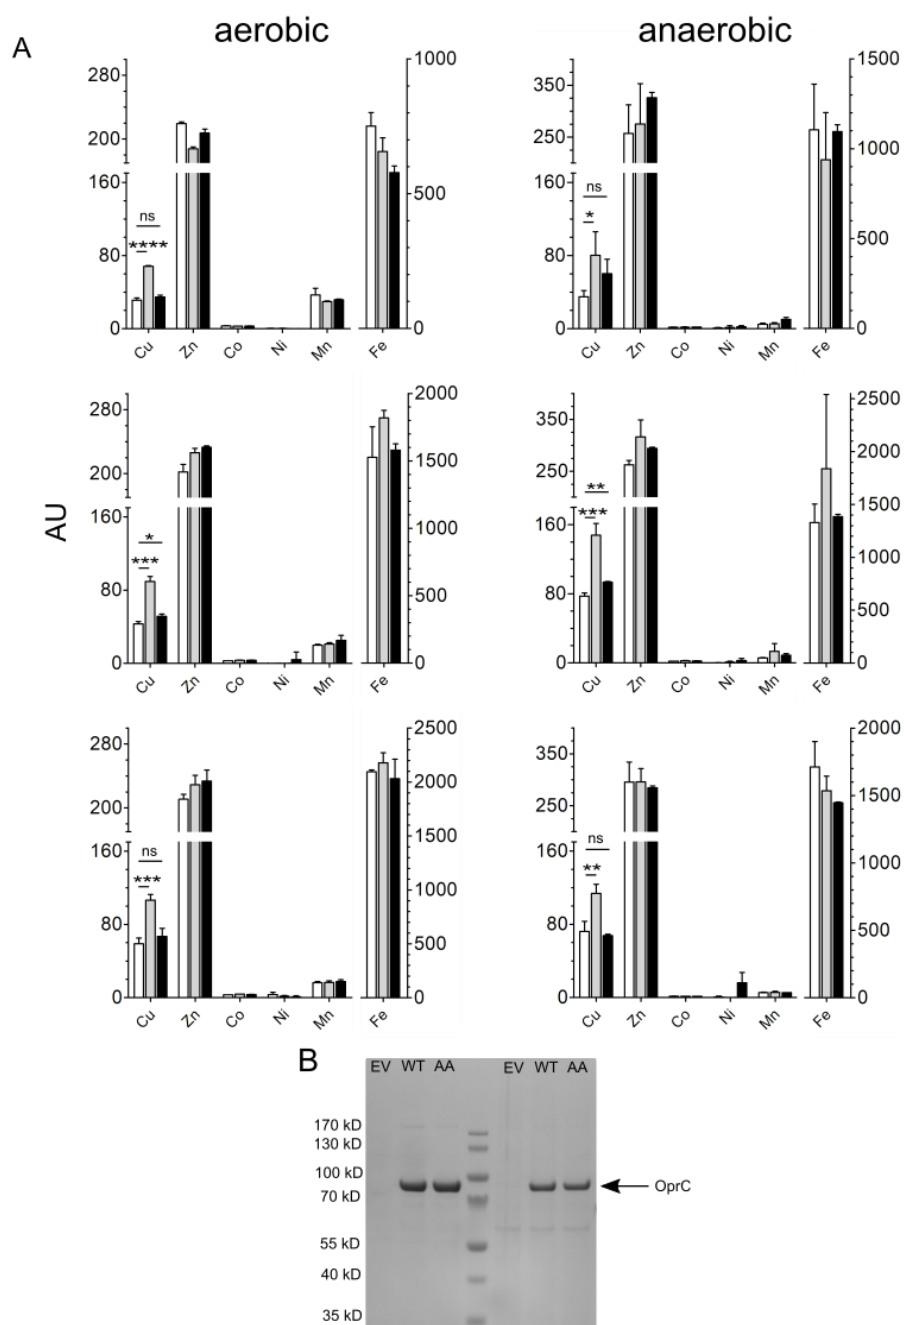

368

369 **Figure 6. OprC is an OM copper importer.** Whole-cell metal content of PA14  $\Delta oprC$   
370 cells overexpressing empty vector (white bars) OprC<sub>WT</sub> (grey bars) and OprC<sub>AA</sub> proteins (black  
371 bars) analysed via ICP-MS. Cell associated metal content was determined in cells grown in  
372 rich media supplemented with 100 mM sodium nitrate (no added copper) under both aerobic  
373 (left panels) and anaerobic conditions (right panels). The three biological replicates are plotted  
374 separately due to differences in absolute metal levels. Reported values are averages  $\pm$  s.d. (n  
375 = 3). Significant levels were analysed via unpaired two tailed t-test. ns., not significant ( $p \geq$   
376 0.05); \*,  $p \leq 0.05$ ; \*\*,  $p \leq 0.01$ ; \*\*\*,  $p \leq 0.001$ ; \*\*\*\*,  $p \leq 0.0001$ . (G) SDS-PAGE gel of pHERD30-  
377 overexpressed OprC<sub>WT</sub> and OprC<sub>AA</sub> proteins in PA14  $\Delta oprC$  after IMAC. Molecular weight  
378 marker is shown on the left.  
379

### 380 **OprC is abundant in *P. aeruginosa* during infection.**

381 A recent study(36) suggested that OprC increases the virulence of *P. aeruginosa*, but did not  
382 provide a measure of the abundance of the transporter *in vivo*. To determine the abundance  
383 of OprC in *P. aeruginosa* UCBPP-PA14 and *Acinetobacter baumannii* ATCC 19606 in infected  
384 lung tissues, we employed a sensitive targeted proteomics approach with parallel reaction  
385 monitoring, with absolute quantification using heavy-isotope labeled reference peptides  
386 (Methods). The results showed that in both mouse and rat pneumonia models, OprC was  
387 present at 1,000 to 10,000 molecules per *P. aeruginosa* cell, making it one of the five most  
388 abundant TonB-dependent transporters. As a comparison, the most abundant TonB-  
389 dependent transporter, FpvA, had 8,000 to 33,000 molecules per cell. We also assessed OprC  
390 abundance in *A. baumannii*, due to the facts that (i) AbOprC has also been linked to  
391 virulence(37) and (ii) both proteins are highly similar (50% sequence identity, Fig. S6).  
392 Moreover, both bacteria are important human pathogens with a similar, low-permeability OM.  
393 In *A. baumannii*, OprC was less abundant in mouse and rat pneumonia models (40 to 400  
394 molecules per cell), while the most abundant TonB-dependent transporters BfnH and BauA  
395 were present at 500 to 3'000 molecules per cell.

396

### 397 **Discussion**

398 Our data show that the TBDT OprC binds copper at an unusual CxxxM-HxM site that becomes  
399 solvent excluded upon metal binding, kinetically trapping the metal and precluding  
400 determination of metal binding affinities. While our data strongly suggest that the CxxxM-HxM  
401 site can accommodate both Cu(I) and Cu(II), the observed crystal structure is that with Cu(I)  
402 bound, and the precise geometry of the binding site with Cu(II) is unknown. The copper site  
403 most similar to that of Cu(I) in OprC occurs in class I Type I copper proteins like cytochrome  
404 c oxidase, pseudoazurin and plastocyanin, electron transfer proteins that can coordinate both  
405 Cu(I) and Cu(II) via 2Cys+1Met+1His site or 2His+1Cys+1Met sites. Interestingly, the active  
406 site His117 in azurin renders the copper atom solvent inaccessible(38, 39), reminiscent to the  
407 likely role of Met147 in OprC. The superficial similarity of the OprC binding site to that of



408 (pseudo)azurin prompted us to generate the M147H and M325H OprC mutants in an attempt  
409 to convert OprC into a unique, blue copper transport protein. However, in the presence of  
410 added Cu(II), both mutants remain colourless, and comparison of the crystal structures with  
411 those of pseudoazurin and plastocyanin show small but most likely important differences in  
412 the geometries of the active sites (Fig. S7). All four residues in the OprC binding site contribute  
413 to copper binding, but not to the same extent and, in some cases, not equally for both copper  
414 redox states. This is illustrated by Cys143, which is essential for high-affinity Cu(II) binding but  
415 dispensable for Cu(I). By contrast, removal of His323 still allows Cu(II) and Cu(I) binding. The  
416 presence of a methionine binding track, constituting several low-affinity binding sites for  
417 Ag(I)/Cu(I) but not for Cu(II), suggests that metal delivery to OprC may occur in different ways  
418 for Cu(I) and Cu(II). Methionines also coordinate Cu(I) in other copper transporters, such as  
419 the bacterial CusABC and CopA exporters and the eukaryotic Ctr1 copper importer(17, 18,  
420 40-42). These transporters have been shown to also transport silver, but structures with silver  
421 have been determined only for the Cus system(17, 40). By analogy, our structural data  
422 therefore suggest that OprC can also import silver. The ability of OprC to acquire Cu(I) could  
423 be important for biofilms, which are anaerobic to various degrees depending on the location  
424 inside the biofilm(43, 44). Oxygen tension also reduces as lung chronic disease mediated by  
425 *P. aeruginosa* progresses, turning airway mucus into an anaerobic environment in cystic  
426 fibrosis patients that will favour the availability of Cu(I) (45). *P. aeruginosa* is capable of  
427 anaerobic respiration by using nitrate, nitrite or nitrous oxide as terminal electron acceptor  
428 (46), and OprC has been shown to be induced under anaerobic conditions(47).

429  
430 With respect to Cu(II), the affinity of 2.6  $\mu$ M reported by an early study (26) most likely resulted  
431 from non-specific binding, since the rich media used (48) to culture *P. aeruginosa* would have  
432 generated OprC with high copper occupancy. A recent study in *P. aeruginosa* proposed a  
433 novel copper uptake mechanism in copper-limited conditions, which involves secretion of the  
434 copper binding protein azurin by a CueR-regulated Type VI secretion system. The secreted  
435 azurin would scavenge Cu(II) from the environment and load it onto OprC via a direct  
436 interaction, conferring a competitive advantage under copper-limiting conditions(29). Delivery  
437 by azurin would be an efficient way to load OprC with Cu(II) and would presumably not require  
438 any low affinity sites to direct the metal to the principal binding site as for Cu(I). However, the  
439 pulldown experiment done by Han et al. to show the azurin-OprC interaction was done with  
440 OprC folded *in vitro* from inclusion bodies (29). Given that TBDTs are hard to fold *in vitro* due  
441 to their large size and complex architecture, and no attempts were made to assess the  
442 functionality of the obtained OprC, its interaction with azurin remains to be confirmed. In our

443 hands, no complex formation between OM-purified, functional OprC and azurin was observed  
444 via SEC, suggesting any interaction will be transient.

445

446 Given that copper, and in particular the more toxic Cu(I), is a known antimicrobial, the  
447 presence of bacterial proteins dedicated to copper acquisition such as OprC might be  
448 problematic under certain conditions. Indeed, it is thought that, in contrast to iron that is  
449 withheld from a pathogen by the host during infection, elevated levels of host-derived copper  
450 in e.g. macrophages could be an alternative "nutritional immunity" antimicrobial response(49).  
451 In this model, bacterial virulence would be attenuated by mutations, particularly in transporters,  
452 that cause copper sensitivity(49). However, recent data suggest that deletion of *oprC* results  
453 in reduced quorum sensing, impaired motility and lower virulence of *P. aeruginosa*, leading to  
454 the proposal that the presence of OprC is critical for virulence(36). In addition, another recent  
455 study reported decreased virulence of an *A. baumannii oprC* knockout(37). The decreased  
456 virulence of *oprC* knockouts in these studies appears at odds with what one would expect from  
457 the copper nutritional immunity model(49), as is our proteomics data showing that OprC is  
458 very abundant in a *P. aeruginosa* mouse infection model. While we did not assess *oprC*-  
459 dependent virulence, these data do suggest that copper is withheld by the host under many  
460 experimental conditions. While much still needs to be learned, it is clear that regulation of any  
461 copper import protein is crucial, possibly both at the gene and protein level. Unfortunately, and  
462 in contrast to the many copper stress genes that, as part of the CopR or CueR regulons, are  
463 upregulated under aerobic conditions during copper stress(9, 11, 27, 28, 50, 51), nothing is  
464 known about how *oprC* is downregulated during such stress. Intriguingly, *oprC* (*PA3790*) is in  
465 an operon with *PA3789*, which encodes for an uncharacterised inner membrane protein  
466 containing PepSY domains, hinting at a peptidase function(27). Another protein strongly  
467 downregulated during copper stress is PA5030, which is an MFS transporter with a large  
468 number of His+Met residues (26 out of 438 residues), suggesting it could mediate copper  
469 delivery to the cytoplasm, possibly in concert with OprC and an as yet unidentified periplasmic  
470 protein(27).

471

472 OprC is the first example of a TBDT that mediates copper import without a metallophore. The  
473 TBDT with the closest substrate specificity to OprC is the ionic zinc transporter ZnuD from  
474 *Neisseria meningitidis*, the structure of which has been solved(52). Large structural  
475 differences between OprC and ZnuD exist for the extracellular loops (overall C $\alpha$  r.m.s.d. ~5.9  
476 Å). ZnuD has several discrete low-affinity binding sites that may guide the metal towards the  
477 high-affinity binding site (52). In OprC, a distinctive "methionine track" provides low-affinity  
478 binding sites to guide copper to the high affinity site. Interestingly, while the extracellular loops

479 between OprC and ZnuD are very different and the overall sequence identity is only 28%, the  
480 metal binding sites are located at very similar positions and only 2.8 Å apart (Fig. S8),  
481 suggesting that the transport channel formed via TonB interaction may be similar. Inspection  
482 of the ZnuD structure shows that the zinc binding site is excluded from solvent, and we  
483 propose that the zinc ion in ZnuD is kinetically trapped, analogous to copper in OprC.

484

485 OprC shares ~60 % identity to NosA from *Pseudomonas stutzeri*, for which no structure is  
486 available. Like OprC, NosA is expressed under anaerobic conditions and repressed in the  
487 presence of µM concentrations Cu(II) (53-55). *P. stutzeri* NosA antibodies did not react with  
488 *P. aeruginosa* (53), but our structure identifies NosA as an OprC ortholog, since the CxxxM-  
489 HxM copper binding motif and some of the methionine track residues are conserved (Fig. S6).  
490 NosA is important during denitrification in *P. stutzeri* JM300 and was proposed to load copper  
491 either directly or indirectly to the periplasmic N<sub>2</sub>O reductase NosZ (53-55). However, a more  
492 recent report for a different *P. stutzeri* strain found no difference between NosZ activity and  
493 copper content for a *nosA* knockout (56). In addition, OprC/NosA also occurs in a number of  
494 non-denitrifying *Proteobacteria* such as *Salmonella enterica*, *Klebsiella pneumoniae* and  
495 *Acinetobacter baumannii* (Fig. S6), showing that NosZ maturation is not a general function of  
496 OprC. The occurrence of OprC in some (e.g. *S. enterica*) but not in other (e.g. *E. coli*)  
497 Enterobacteria is intriguing, given that the OM of all Enterobacteria is relatively permeable to  
498 small molecules due to abundant general porins such as OmpC (57).

499

## 500 **Methods**

501 **Recombinant production of *Pseudomonas aeruginosa* OprC.** The mature version of the  
502 gene coding for *oprC* of *P. aeruginosa* PAO1 (UniProt ID; PA3790)(58), starting with His56 as  
503 determined by Nakae et al.(26), was synthesized to include a 7 x His tag at the N-terminus  
504 (Eurofins, UK), cloned into the pB22 arabinose-inducible expression vector(59) and  
505 transformed into chemically competent *Escherichia coli* DH5α cells. After expression and  
506 processing by signal peptidase, the N-terminal sequence of this construct is  
507 NVRLQHSHHHHHLEAEEHSQHQ-. A second version of this construct was constructed in a  
508 pB22 version containing a tobacco etch virus (TEV) site after the His7-tag. Correct sequences  
509 were confirmed by DNA sequencing (Eurofins, UK) using both forward and reverse plasmid-  
510 specific primers. The OprC<sub>AA</sub> mutant was produced by changing the key amino acids Cys143  
511 and Met147 to alanine residues using the KLD Quickchange site-directed mutagenesis kit  
512 (New England Biolabs, UK) and specific primers containing both mutation sites (forward: 5` -

513 tcgcgcggatgcaccaaccagctatattagc-3'; reverse: 5'-ttcggggcggcgccaagcatcatgc-3'). The single  
514 mutants C143A, M147A, H323A, M325A, M147H and M325H were made in similar ways.

515

516 OprC recombinant protein production and purification was performed as follows: *E. coli* C43  
517  $\Delta$ cyo was electroporated with expression vector, recovered for 60 minutes in LB (Sigma, UK)  
518 at 37 °C, and plated on LB agar (Sigma, UK) containing 100  $\mu$ g mL<sup>-1</sup> ampicillin (Melford, UK).  
519 Transformants were cultured in LB medium or in LeMasters-Richards (LR) minimal medium  
520 with glycerol (2-3 g/l) as carbon source. All media contained 100  $\mu$ g mL<sup>-1</sup> ampicillin. For rich  
521 media, cells were grown (37 °C, 180rpm) until OD600 ~0.6, when protein expression was  
522 induced with 0.1% arabinose for 4-5 h at 30 °C or overnight at 16 °C (150 rpm). For LR media,  
523 a small overnight pre-culture in LB was used at 1/100 v/v to inoculate an LR-medium pre-  
524 culture early in the morning (typically 1 ml preculture for 100 ml of cells was used), which was  
525 grown during the day at 37 °C. After late afternoon inoculation, large-scale cultures (typically  
526 6-8 l) were grown overnight at 30 °C until OD 0.4-0.7, followed by induction with 0.1%  
527 arabinose at 30 °C for 6-8 hours. Cells were harvested by centrifugation (5,000 rpm, 20  
528 minutes, 4 °C), and pellets homogenized in 20 mM Tris (Sigma), 300 mM NaCl (Fisher) pH  
529 8.00 (TBS buffer), in the presence of 10 mM ethylenediamine tetra-acetic acid (EDTA, Sigma).  
530 Cells were broken by one pass through a cell disruptor (Constant Systems 0.75 kW operated  
531 at 23 kpsi), centrifuged at 42,000 rpm for 45 minutes at 4 °C (45Ti rotor; Beckman), and the  
532 resulting total membrane fraction was homogenized in TBS buffer containing 1.5% Lauryl-  
533 dimethylamine oxide (LDAO) (Sigma, UK). Membrane proteins were extracted by stirring (60  
534 minutes, 4 °C), centrifuged (42,000 rpm in 45Ti rotor, 30 minutes, 4°C), and the membrane  
535 extract was loaded on a Chelating Sepharose Fast Flow bed resin (~10 ml; GE Healthcare,  
536 UK) previously activated with 200 mM NiCl<sub>2</sub> (Sigma) and equilibrated in TBS containing 0.15  
537 % n-dodecyl-beta-D-maltopyranoside (DDM). After washing with 15 column volumes buffer  
538 with 30 mM imidazole, protein was eluted with 0.25 M imidazole buffer (Fisher), incubated with  
539 20 mM EDTA (30 minutes, 4 °C), and loaded on a Superdex 200 16/600 size exclusion column  
540 equilibrated with 10 mM Hepes, 100 mM NaCl, 0.05% DDM, 10 mM EDTA, pH 7.5. Peak  
541 fractions were pooled and concentrated using a 50 MWCO Amicon filter (Millipore, UK),  
542 analyzed on SDS-PAGE, flash-frozen in liquid nitrogen and stored at -80C. Typical yields of  
543 purified wild type and most mutant OprC proteins ranged between 2-5 mg per l media grown  
544 at 16 °C. All media and buffer components were made in fresh milli-Q water.

545

546 Protein preparations intended for crystal trials were pooled and buffer-exchanged to 10 mM  
547 Hepes 100 mM NaCl, 0.4% tetraethylene glycol mono-octyl ether (C<sub>8</sub>E<sub>4</sub>) (Anatrace, US), pH

548 7.5. NaNO<sub>3</sub> was substituted for NaCl for protein preparations intended for crystal trials with  
549 silver in order to avoid formation of insoluble AgCl. Protein preparations to be used for metal  
550 analysis after removal of the His-tag underwent a slightly different protocol. The elution fraction  
551 from immobilized metal affinity chromatography (IMAC) was buffer-exchanged to 50 mM Tris,  
552 0.5 mM EDTA, 0.2 mM TCEP, 100 mM NaCl, 0.05% DDM (Anatrace, US), pH 7.50, and  
553 submitted to TEV protease digestion (ratio 1 mg TEV: 10 mg protein, 4 °C, overnight). Samples  
554 were submitted to a second IMAC column, where flow-through and wash fractions were  
555 combined for the subsequent SEC step in 10 mM HEPES 100 mM NaCl 0.05 % DDM 0.5 mM  
556 EDTA pH 7.5. Protein concentration was determined by BCA assay (Thermo Scientific, UK)  
557 and by UV/Vis absorbance at 280nm (considering OprC E<sub>0.1%</sub> = 1.6 as determined by  
558 ProtParam).

559

560 **In vitro metal binding assays and Inductively Coupled Plasma Mass Spectrometry (ICP-**  
561 **MS).** OprC samples intended for metal binding assays were exchanged into respective chelex-  
562 treated buffers without EDTA and were equilibrated with different equivalents of Cu(II) or  
563 Zn(II), for 30 min at room temperature (n=3). Protein concentrations used were in the range  
564 of 10 – 20 µM. Samples were loaded on an analytical Superdex 200 Increase 10/300GL (GE  
565 Healthcare) column, equilibrated in 10 mM Hepes, 100 mM NaCl, 0.05% DDM, 0.5 mM EDTA  
566 pH 7.5. Size exclusion peaks were pooled, concentrated and quantified for protein by UV  
567 absorbance at 280 nm. Protein samples were diluted 10-fold in 2.5% HNO<sub>3</sub>. Analytical metal  
568 standards of 0 – 500 ppb were prepared by serial dilution from individual metal stocks (VWR,  
569 UK) and were matrix-matched to protein samples. Samples and standard curves were  
570 analysed by inductively coupled plasma mass spectrometry (ICP-MS) using Durham  
571 University Bio-ICP-MS Facility (Thermo X-series instrument, Thermo Fisher Scientific;  
572 PlasmaLab Software) running in standard mode (for <sup>55</sup>Mn, <sup>59</sup>Co, <sup>60</sup>Ni, <sup>65</sup>Cu, <sup>66</sup>Zn) or collision  
573 cell mode (for <sup>56</sup>Fe). OprC WT samples were screened for the presence of <sup>56</sup>Fe, <sup>55</sup>Mn, <sup>59</sup>Co,  
574 <sup>60</sup>Ni, <sup>65</sup>Cu, <sup>66</sup>Zn and rest were typically screened for the presence of <sup>65</sup>Cu and <sup>66</sup>Zn. The  
575 increase in copper content in "as purified" tagless WT protein (Fig. 3b) is most likely due to  
576 the use of a second IMAC column after tag cleavage. In addition to the additional handling  
577 steps that could have increased copper content, the NiCl<sub>2</sub> used for the IMAC column might  
578 contain traces of copper.

579

580 **Copper extraction (demetallation) experiments.** OprC<sub>WT</sub>, OprC<sub>AA</sub> and M147A samples  
581 were incubated with 3 equivalents copper for 30 min and then loaded onto a Superdex S-200  
582 Increase 10/300GL column equilibrated with 10 mM HEPES 100 mM NaCl 0.05 % DDM 0.5

583 mM EDTA pH 7.5. Peak fractions were pooled, concentrated and quantified by UV absorbance  
584 at 280 nm. Samples were exchanged into respective chelex-treated buffer without EDTA. For  
585 demetallation experiments, 20  $\mu$ M of copper-bound proteins were taken in duplicates and  
586 incubated with 100-fold excess of the copper chelator bathocuproine disulfonate (BCS)  
587 (Sigma) and 100-fold excess of the reducing agent hydroxyl amine ( $\text{NH}_2\text{OH}$ ) (Sigma) at 60 °C  
588 and room temperature. BCS is a high-affinity Cu(I) chelator ( $\log\beta_2$  20.8) and forms a 2:1  
589 complex with Cu(I), namely  $[\text{Cu}(\text{BCS})_2]^{-3}$ , with a molar extinction coefficient of 13,300  $\text{cm}^{-1} \text{M}^{-1}$   
590 at 483nm, enabling quantitation of Cu(I)(60).

591

592 **Protein crystallization, data collection and structure determination.** Sitting-drop  
593 crystallization trials were set up using a Mosquito crystallization robot (TTP Labtech) with  
594 commercial screens (MemGold1 and MemGold2, Molecular Dimensions) at 20 °C. To obtain  
595 the initial structure of Cu-bound OprC, the protein (~12 mg/ml) was incubated with 3 mM  $\text{CuCl}_2$   
596 for 1 hr at room temperature, followed by setting up crystallisation trials. A number of initial  
597 hits were obtained and were subsequently optimised by manual hanging drop vapour diffusion  
598 using larger drops (typically 1-1.5  $\mu$ l protein + 1  $\mu$ l reservoir). Well-diffracting crystals (~3 Å  
599 resolution at a home source) were obtained in 0.1 M NaCl/0.15 M  $\text{NH}_4\text{SO}_4$ /0.1 M MES pH  
600 6.5/18-22% PEG1000. Crystals were cryoprotected with mother liquor lacking  $\text{CuCl}_2$   
601 containing 10% PEG400 for ~5-10 s and flash-frozen in liquid nitrogen. Diffraction data were  
602 collected at Diamond Light Source (Didcot, UK) at beamline i02. For the best crystal, belonging  
603 to space group C222<sub>1</sub>, 720 degrees of data were collected at an energy of 8994 eV,  
604 corresponding to the K-edge of copper (Table S1). Data were autoprocessed by xia2(61) .  
605 The structure was solved via single anomalous dispersion (SAD) via AUTOSOL in Phenix(62)  
606 . Two copper sites were found, one for each OprC molecule in the asymmetric unit (Fig. S1).  
607 The phases were of sufficient quality to allow automated model building via Phenix  
608 AUTOBUILD, generating ~60% of the structure and using data to 2.0 Å. The remainder of the  
609 structure was built manually, via iterative cycles of refinement in Phenix and model building in  
610 COOT(63). Metal coordination was analysed by the Check-my-metal server(64). The final  
611 refinement statistics are listed in Table S1. Subsequently, crystals were also obtained without  
612 any copper supplementation of the protein. These were isomorphous to those described  
613 above and obtained under identical conditions. Molecular replacement indicated the presence  
614 of copper and an identical structure to that obtained above (data not shown). OprC<sub>AA</sub> crystals  
615 (~10 mg/ml protein) were obtained and optimized by hanging drop vapor diffusion as  
616 described above, and diffraction-quality crystals were obtained in the same conditions as for  
617 Cu-OprC, *i.e.* 0.1 M sodium chloride/0.15 M ammonium sulfate/0.01 M MES sodium pH  
618 6.5/19% (w/v) PEG1000. Interestingly however, the OprC<sub>AA</sub> crystals belong to a different

619 space group (P22<sub>1</sub>2<sub>1</sub>), most likely as a result of the structural differences between both OprC  
620 variants. Diffraction data were collected at Diamond Light Source (Didcot, UK) at beamline  
621 I24. Diffraction data were processed in XDS (65). The structure was solved by molecular  
622 replacement (MR) using Phaser, with wildtype OprC as the search model. Model building was  
623 done in COOT and refinement in Phenix. As for Cu-OprC, the data collection and refinement  
624 statistics are shown in Table S1. C143A and H323A proteins (~10-12 mg/ml protein) were  
625 incubated with 2 mM CuSO<sub>4</sub> at room temperature for 1 hr, followed by co-crystallisation.  
626 Diffracting crystals for both C143A and H323A in the presence of copper were obtained in  
627 0.34 M Ammonium sulfate/0.1 M Sodium citrate pH 5.5/12 -16 % w/v PEG 4000 and were  
628 cryo-protected using mother liquor lacking CuSO<sub>4</sub> and with 25% ethylene glycol for ~10 s and  
629 flash-frozen in liquid nitrogen. M147H and M325H crystals were obtained in the same  
630 condition as those for wild type OprC. For co-crystallisation with silver, OprC proteins were  
631 incubated with 2 mM AgNO<sub>3</sub> for 1 hour at room temperature, followed by co-crystallisation.  
632 Well-diffracting OprC<sub>WT</sub> crystals with silver were obtained under the same conditions as in the  
633 presence of copper. For the best OprC<sub>WT</sub> crystal, belonging to space group C222<sub>1</sub>, 999  
634 degrees of data were collected at an energy of 8000 eV to obtain anomalous signals for Ag.  
635 C143A and H323A crystals (~10-12 mg/ml protein) with Ag were obtained from 0.2 M Choline  
636 chloride/0.1 M Tris pH 7.5/12-16 % w/v PEG 2000 MME and 0.5 M Potassium chloride/0.05  
637 M HEPES pH 6.5/12-16 % v/v PEG 400, respectively. Crystals were cryoprotected for 5-20 s  
638 with mother liquor lacking AgNO<sub>3</sub> but containing 25% ethylene glycol for C143A and 20 %  
639 PEG 400 for H323A. For C143A and H323A crystallised in the presence of copper or silver,  
640 datasets of 360 degrees each were collected at energies of 8800 and 9175 eV, using different  
641 parts of the same crystal (Tables S2 and S3).

642

### 643 **Electron Paramagnetic Resonance Spectroscopy.**

644 Electron Paramagnetic Resonance (EPR) measurements were carried out using a Bruker  
645 ELEXSYS-E500 X-band EPR spectrometer operating in continuous wave mode, equipped  
646 with an Oxford variable-temperature unit and ESR900 cryostat with Super High-Q resonator.  
647 All EPR samples were prepared in quartz capillary tubes (outer diameter; 4.0 mm, inner  
648 diameter 3.0 mm) and frozen immediately in liquid N<sub>2</sub> until further analysis. The experimental  
649 setup and conditions were similar to those reported previously(66). The low temperature EPR  
650 spectra were acquired using the following conditions: sweep time of 84 s, microwave power  
651 of 0.2 mW, time constant of 81 ms, average microwave frequency of 9.44 GHz and modulation  
652 amplitude of 5 G, T = 20 K. The concentration of OprC<sub>WT</sub> and M147A varied from 210-260 μM  
653 in 10 mM HEPES, 100 mM NaCl, 0.03 % DDM (n-dodecyl-D-maltoside), pH 7.5.

654

655 **Determination of whole cell metal content.**

656 Whole cell metal content was determined as described previously. Briefly, overnight bacterial  
657 cultures of overexpressed OprC WT and OprC AA (with empty vector as control) in PA14  
658  $\Delta oprC$  background were diluted with 1:100 fresh LB supplemented with 100 mM NaNO<sub>3</sub>, and  
659 were grown to an OD of around 1.0 at 37 C. 25 ml cultures were pelleted and were washed  
660 twice in TBS and once in 20 mM Tris 0.5 M sorbitol and 200 uM EDTA pH 7.5. The cell pellets  
661 were digested in 1 ml of 68 % conc. nitric acid for > 24h. Digested sample pellets were diluted  
662 10 fold in 2 % nitric acid (prepared in chelex-treated milli-Q water) and were analyzed by ICP-  
663 MS. Results were corrected for ODs and dilution factors. Protein levels in the OM were verified  
664 by IMAC. Briefly, 0.5 liter of OprC<sub>WT</sub> and OprC<sub>AA</sub> overexpressing strains (with empty vector as  
665 control) in the *P. aeruginosa*  $\Delta oprC$  background strain were grown in LB (supplemented with  
666 100 mM NaNO<sub>3</sub> and 0.1% arabinose) for 6h to OD<sub>600</sub> ~1.0, followed by cell harvesting, cell  
667 lysis and purification as described above for *E. coli*.

668

669 ***In vivo* metal toxicity assays.**

670 For metal toxicity assays in *P. aeruginosa*, overexpressed OprC WT, C143A and AA strains  
671 using broad range plasmid pHERD30 (with empty vector as control) in PA14  $\Delta oprC$  were  
672 used and assays were performed in anaerobic conditions. The Cu(II) (CuSO<sub>4</sub>) range tested  
673 varied from 0-7 mM. Cultures in triplicates were inoculated with 1:100 of the pre-cultures grown  
674 in anaerobic conditions (LB with 100 mM sodium nitrate). Growth curves of final volume 200  
675  $\mu$ l were set up in 96-well Costar culture plate (Sigma Aldrich) and sealed inside an anaerobic  
676 chamber (Don Whitley Scientific, A35 workstation). Growth was monitored at 600 nm using  
677 an Epoch plate reader (Biotek Instruments Ltd) at 37 °C. Time points were collected with 30  
678 min intervals and experiments were performed in triplicates.

679

680 **Animal infection models.**

681 *Intra-tracheal instillation model:* specific pathogen free (SPF) immunocompetent male  
682 Sprague-Dawley rats weighing 100 - 120 g or male CD-1 mice weighing 20 - 25 g were infected  
683 by depositing an agar bead containing around 10<sup>7</sup> colony-forming units *Acinetobacter*  
684 *baumannii* ATCC 19606 and *Pseudomonas aeruginosa* UCBPP-PA14, deep into the lung via  
685 nonsurgical intra-tracheal intubation(67). In brief, animals were anesthetized with isoflurane  
686 (5%) and oxygen (1.5 L/min) utilizing an anesthesia machine. Depth of anesthesia was  
687 evaluated by absence of gag reflex; if the reflex was present, the animal was placed back  
688 under anesthesia until the reflex disappeared. No animals were utilized until they were fully  
689 anesthetized. Animals were infected via intra-bronchial instillation of molten agar suspension



690 (rats- 100  $\mu$ l) (mice- 20  $\mu$ l) via intra-tracheal intubation, and then allowed to recover. Animals  
691 were returned in their home cages and observed until recovered from anesthesia. At 24 h post  
692 infection, animals were sacrificed and lung was homogenized in sterile saline using a lab  
693 blender. All procedures are in accordance with protocols approved by the GSK Institutional  
694 Animal Care and Use Committee (IACUC), and meet or exceed the standards of the American  
695 Association for the Accreditation of Laboratory Animal Care (AAALAC), the United States  
696 Department of Health and Human Services and all local and federal animal welfare laws.

697

### 698 **Sample workup for proteomics**

699 The sample workup protocol was optimized to deplete host material while maintaining *A.*  
700 *baumannii* and *P. aeruginosa* viability until lysis. All buffers and equipment were used at 0 to  
701 4 °C to minimize proteome changes during sample workup. The sample volume (maximum of  
702 1 ml) was estimated and an equal volume of 1% Tergitol in PBS was added followed by  
703 vigorous vortexing for 30 s. After centrifugation at 500 x g for 5 min, the supernatant was  
704 transferred to a fresh tube, and the pellet was extracted again with 2 ml 0.5% Tergitol in PBS.  
705 The supernatant was combined with the first supernatant and centrifuged at 18'000 x g for 5  
706 min. The pellet was washed with 2 ml and again centrifuged at 18'000 x g for 5 min. The  
707 supernatant was removed, and the pellet was resuspended in 100  $\mu$ L 5% sodium  
708 deoxycholate, 5 mM Tris (2-carboxyethyl) phosphine hydrochloride, 100 mM  $\text{NH}_4\text{HCO}_3$ . The  
709 sample was incubated at 90°C for 1 min. and then stored at -80 °C. Samples were thawed  
710 and sonicated for 2 x 20 s (1 s interval, 100% power). Proteins were alkylated with 10 mM  
711 iodoacetamide for 30 min in the dark at room temperature. Samples were diluted with 0.1M  
712 ammonium bicarbonate solution to a final concentration of 1% sodium deoxycholate before  
713 digestion with trypsin (Promega) at 37°C overnight (protein to trypsin ratio: 50:1). After  
714 digestion, the samples were supplemented with TFA to a final concentration of 0.5% and HCl  
715 to a final concentration of 50 mM. Precipitated sodium deoxycholate was removed by  
716 centrifugation at 4°C and 14'000 rpm for 15 min. Peptides in the supernatant were desalted  
717 on C18 reversed phase spin columns according to the manufacturer's instructions (Macrospin,  
718 Harvard Apparatus), dried under vacuum, and stored at -80°C until further processing.

719

### 720 **Parallel reaction monitoring**

721 Heavy proteotypic peptides (JPT Peptide Technologies GmbH) were chemically synthesized  
722 for *A. baumannii* and *P. aeruginosa* outer membrane proteins. Peptides were chosen  
723 dependent on their highest detection probability and their length ranged between 7 and 20  
724 amino acids. Heavy proteotypic peptides were spiked into each sample as reference peptides

725 at a concentration of 20 fmol of heavy reference peptides per 1 µg of total endogenous protein  
726 mass. For spectrum library generation, we generated parallel reaction-monitoring (PRM)(68)  
727 assays from a mixture containing 500 fmol of each reference peptide. The setup of the µRPLC-  
728 MS system was as described previously(69). Chromatographic separation of peptides was  
729 carried out using an EASY nano-LC 1000 system (Thermo Fisher Scientific) equipped with a  
730 heated RP-HPLC column (75 µm x 37 cm) packed in-house with 1.9 µm C18 resin (Reprosil-  
731 AQ Pur, Dr. Maisch). Peptides were separated using a linear gradient ranging from 97%  
732 solvent A (0.15% formic acid, 2% acetonitrile) and 3% solvent B (98% acetonitrile, 2% water,  
733 0.15% formic acid) to 30% solvent B over 60 minutes at a flow rate of 200 nl/min. Mass  
734 spectrometry analysis was performed on Q-Exactive HF mass spectrometer equipped with a  
735 nanoelectrospray ion source (both Thermo Fisher Scientific). Each MS1 scan was followed by  
736 high-collision-dissociation (HCD) of the 10 most abundant precursor ions with dynamic  
737 exclusion for 20 seconds. Total cycle time was approximately 1 s. For MS1, 3e6 ions were  
738 accumulated in the Orbitrap cell over a maximum time of 100 ms and scanned at a resolution  
739 of 120,000 FWHM (at 200 m/z). MS2 scans were acquired at a target setting of 1e5 ions,  
740 accumulation time of 50 ms and a resolution of 30,000 FWHM (at 200 m/z). Singly charged  
741 ions and ions with unassigned charge state were excluded from triggering MS2 events. The  
742 normalized collision energy was set to 35%, the mass isolation window was set to 1.1 m/z and  
743 one microscan was acquired for each spectrum.

744  
745 The acquired raw-files were converted to the mascot generic file (mgf) format using the  
746 msconvert tool (part of ProteoWizard, version 3.0.4624 (2013-6-3)). Converted files (mgf  
747 format) were searched by MASCOT (Matrix Sciences) against normal and reverse sequences  
748 (target decoy strategy) of the UniProt database of *Acinetobacter baumannii* strains ATCC  
749 19606 and ATCC 17978, and *Pseudomonas aeruginosa* UCBPP-PA14, as well as commonly  
750 observed contaminants. The precursor ion tolerance was set to 20 ppm and fragment ion  
751 tolerance was set to 0.02 Da. Full tryptic specificity was required (cleavage after lysine or  
752 arginine residues unless followed by proline), three missed cleavages were allowed,  
753 carbamidomethylation of cysteins (+57 Da) was set as fixed modification and arginine (+10  
754 Da), lysine (+8 Da) and oxidation of methionine (+16 Da) were set as variable modifications.  
755 For quantitative PRM experiments the resolution of the orbitrap was set to 30,000 FWHM (at  
756 200 m/z) and the fill time was set to 50 ms to reach a target value of 1e6 ions. Ion isolation  
757 window was set to 0.7 Th (isolation width) and the first mass was fixed to 100 Th. Each  
758 condition was analyzed in biological triplicates. All raw-files were imported into Spectrodiver  
759 (Biognosys AG) for protein and peptide quantification.

760

## 761 **Author contributions**

762 BvdB designed the study. SPB and BvdB expressed, purified, and crystallized proteins. AB  
763 collected the diffraction data. SPB and BvdB analysed the diffraction data and refined the  
764 structures. SPB performed metal binding and *in vivo* growth experiments. TRY performed ICP-  
765 MS analyses. MS performed cw-EPR measurements and interpreted the data. SH performed  
766 proteomics experiments, supervised by DB. BvdB and SPB wrote the paper.

767

## 768 **Acknowledgements**

769 SPB is supported by a Biotechnology and Biological Sciences Research Council (BBSRC,  
770 UK) grant (BB/R004366/1 to BvdB). We would like to acknowledge Scott Socoloski, Jennifer  
771 Hoover, Josh West (Glaxo Smith Kline) for providing proteomics samples. We thank Bastien  
772 Belzunces, Chris Skylaris and Syma Khalid (University of Southampton) for exploratory  
773 quantum chemical calculations. We also thank Kevin Waldron (Newcastle University) for  
774 useful discussions and for carrying out initial ICP-MS analyses. We also thank Deenah Osman  
775 and Nigel Robinson (Durham University) for ICP-MS analyses and helpful discussions,  
776 supported by awards BB/L009226/1 and BB/R002118/1 from the BBSRC. TRY was supported  
777 by a Research Fellowship from the Royal Commission for the Exhibition of 1851. We are  
778 indebted to the Diamond Light Source for beam time (proposals mx9948, mx13587 and  
779 mx18598) and beamline assistance. MS acknowledges the EPSRC National (UK) EPR  
780 Research Facility and Service for use of the EPR spectrometers. MS and BvdB thank Luisa  
781 Ciano for the useful discussions at an early stage. The research leading to these results was  
782 in part conducted as part of the Translocation consortium ([www.translocation.eu](http://www.translocation.eu)) and has  
783 received support from the Innovative Medicines Initiatives Joint Undertaking under Grant  
784 Agreement No. 115525, resources that are composed of financial contributions from the  
785 European Union's seventh framework programme (FP7/2007–2013) and European  
786 Federation of Pharmaceutical Industries and Associations companies in-kind contribution.  
787 BvdB would also like to acknowledge the Royal Society for salary support.

788

## 789 **Accession codes**

790 Coordinates and structure factors have been deposited in the Protein Data Bank  
791 (<http://www.ebi.ac.uk/pdbe/>) with accession codes 6FOK (OprC<sub>WT</sub>), 6FOM (OprC<sub>AA</sub>), 6Z8Q  
792 (OprC<sub>WT</sub> Ag 8000 eV), 6Z9I (OprC<sub>C143A</sub> Ag 8800 eV), 6Z99 (OprC<sub>C143A</sub> Ag 9175 eV), 6Z8Y  
793 (OprC<sub>C143A</sub> Cu 8800 eV), 6Z8Z (OprC<sub>C143A</sub> Cu 9175 eV), 6Z8T (OprC<sub>H323A</sub> Ag 8800 eV), 6Z8U  
794 (OprC<sub>H323A</sub> Ag 9175 eV), 6Z8R (OprC<sub>M147H</sub>), 6Z8S (OprC<sub>M325H</sub>), 6Z9N (OprC<sub>H323A</sub> Cu 9175 eV),

795 6Z9Y (OprC<sub>H323A</sub> Cu 8800 eV).

796

## 797 **References**

- 798 1. Hodgkinson V & Petris MJ (2012) Copper homeostasis at the host-pathogen interface.  
799 *The Journal of biological chemistry* 287(17):13549-13555.
- 800 2. Harrison JJ, Ceri H, & Turner RJ (2007) Multimetal resistance and tolerance in  
801 microbial biofilms. *Nature reviews. Microbiology* 5(12):928-938.
- 802 3. Lemire JA, Harrison JJ, & Turner RJ (2013) Antimicrobial activity of metals:  
803 mechanisms, molecular targets and applications. *Nature reviews. Microbiology*  
804 11(6):371-384.
- 805 4. Braymer JJ & Giedroc DP (2014) Recent developments in copper and zinc  
806 homeostasis in bacterial pathogens. *Current opinion in chemical biology* 19:59-66.
- 807 5. Robinson NJ & Winge DR (2010) Copper metallochaperones. *Annual review of*  
808 *biochemistry* 79:537-562.
- 809 6. Hernandez-Montes G, Arguello JM, & Valderrama B (2012) Evolution and diversity of  
810 periplasmic proteins involved in copper homeostasis in gamma proteobacteria. *BMC*  
811 *microbiology* 12:249.
- 812 7. Zimmermann M, *et al.* (2012) PcoE--a metal sponge expressed to the periplasm of  
813 copper resistance Escherichia coli. Implication of its function role in copper resistance.  
814 *Journal of inorganic biochemistry* 115:186-197.
- 815 8. Vita N, *et al.* (2015) A four-helix bundle stores copper for methane oxidation. *Nature*  
816 525(7567):140-143.
- 817 9. Zhang XX & Rainey PB (2008) Regulation of copper homeostasis in *Pseudomonas*  
818 *fluorescens* SBW25. *Environmental microbiology* 10(12):3284-3294.
- 819 10. Arguello JM, Raimunda D, & Padilla-Benavides T (2013) Mechanisms of copper  
820 homeostasis in bacteria. *Frontiers in cellular and infection microbiology* 3:73.
- 821 11. Hu YH, Wang HL, Zhang M, & Sun L (2009) Molecular analysis of the copper-  
822 responsive CopRSCD of a pathogenic *Pseudomonas fluorescens* strain. *Journal of*  
823 *microbiology* 47(3):277-286.
- 824 12. Rubino JT & Franz KJ (2012) Coordination chemistry of copper proteins: how nature  
825 handles a toxic cargo for essential function. *Journal of inorganic biochemistry*  
826 107(1):129-143.
- 827 13. Ma Z, Jacobsen FE, & Giedroc DP (2009) Coordination chemistry of bacterial metal  
828 transport and sensing. *Chemical reviews* 109(10):4644-4681.

- 829 14. Boal AK & Rosenzweig AC (2009) Structural biology of copper trafficking. *Chemical*  
830 *reviews* 109(10):4760-4779.
- 831 15. Gonzalez-Guerrero M & Arguello JM (2008) Mechanism of Cu<sup>+</sup>-transporting ATPases:  
832 soluble Cu<sup>+</sup> chaperones directly transfer Cu<sup>+</sup> to transmembrane transport sites.  
833 *Proceedings of the National Academy of Sciences of the United States of America*  
834 105(16):5992-5997.
- 835 16. Outten FW, Huffman DL, Hale JA, & O'Halloran TV (2001) The independent cue and  
836 cus systems confer copper tolerance during aerobic and anaerobic growth in  
837 *Escherichia coli*. *The Journal of biological chemistry* 276(33):30670-30677.
- 838 17. Su CC, *et al.* (2011) Crystal structure of the CusBA heavy-metal efflux complex of  
839 *Escherichia coli*. *Nature* 470(7335):558-562.
- 840 18. Kulathila R, Kulathila R, Indic M, & van den Berg B (2011) Crystal structure of  
841 *Escherichia coli* CusC, the outer membrane component of a heavy metal efflux pump.  
842 *PloS one* 6(1):e15610.
- 843 19. Ekici S, Yang H, Koch HG, & Daldal F (2012) Novel transporter required for biogenesis  
844 of cbb3-type cytochrome c oxidase in *Rhodobacter capsulatus*. *mBio* 3(1).
- 845 20. Khalfaoui-Hassani B, *et al.* (2018) Widespread Distribution and Functional Specificity  
846 of the Copper Importer CcoA: Distinct Cu Uptake Routes for Bacterial Cytochrome c  
847 Oxidases. *mBio* 9(1).
- 848 21. De Feo CJ, Aller SG, Siluvai GS, Blackburn NJ, & Unger VM (2009) Three-dimensional  
849 structure of the human copper transporter hCTR1. *Proceedings of the National*  
850 *Academy of Sciences of the United States of America* 106(11):4237-4242.
- 851 22. Dassama LM, Kenney GE, Ro SY, Zielazinski EL, & Rosenzweig AC (2016)  
852 Methanobactin transport machinery. *Proceedings of the National Academy of*  
853 *Sciences of the United States of America* 113(46):13027-13032.
- 854 23. Govan JR & Deretic V (1996) Microbial pathogenesis in cystic fibrosis: mucoid  
855 *Pseudomonas aeruginosa* and *Burkholderia cepacia*. *Microbiological reviews*  
856 60(3):539-574.
- 857 24. Lyczak JB, Cannon CL, & Pier GB (2000) Establishment of *Pseudomonas aeruginosa*  
858 infection: lessons from a versatile opportunist. *Microbes and infection* 2(9):1051-1060.
- 859 25. Chevalier S, *et al.* (2017) Structure, function and regulation of *Pseudomonas*  
860 *aeruginosa* porins. *FEMS microbiology reviews* 41(5):698-722.
- 861 26. Yoneyama H & Nakae T (1996) Protein C (OprC) of the outer membrane of  
862 *Pseudomonas aeruginosa* is a copper-regulated channel protein. *Microbiology* 142 (  
863 Pt 8):2137-2144.

- 864 27. Quintana J, Novoa-Aponte L, & Arguello JM (2017) Copper homeostasis networks in  
865 the bacterium *Pseudomonas aeruginosa*. *The Journal of biological chemistry*  
866 292(38):15691-15704.
- 867 28. Teitzel GM, *et al.* (2006) Survival and growth in the presence of elevated copper:  
868 transcriptional profiling of copper-stressed *Pseudomonas aeruginosa*. *Journal of*  
869 *bacteriology* 188(20):7242-7256.
- 870 29. Han Y, *et al.* (2019) A *Pseudomonas aeruginosa* type VI secretion system regulated  
871 by CueR facilitates copper acquisition. *PLoS pathogens* 15(12):e1008198.
- 872 30. Tsukihara T, *et al.* (1996) The whole structure of the 13-subunit oxidized cytochrome  
873 c oxidase at 2.8 Å. *Science* 272(5265):1136-1144.
- 874 31. Robinson H, *et al.* (1999) Structural basis of electron transfer modulation in the purple  
875 CuA center. *Biochemistry* 38(18):5677-5683.
- 876 32. Shibata N, *et al.* (1999) Novel insight into the copper-ligand geometry in the crystal  
877 structure of *Ulva pertusa* plastocyanin at 1.6-Å resolution. Structural basis for  
878 regulation of the copper site by residue 88. *The Journal of biological chemistry*  
879 274(7):4225-4230.
- 880 33. Celia H, *et al.* (2016) Structural insight into the role of the Ton complex in energy  
881 transduction. *Nature* 538(7623):60-65.
- 882 34. Noinaj N, Guillier M, Barnard TJ, & Buchanan SK (2010) TonB-dependent  
883 transporters: regulation, structure, and function. *Annual review of microbiology* 64:43-  
884 60.
- 885 35. Qiu D, Damron FH, Mima T, Schweizer HP, & Yu HD (2008) PBAD-based shuttle  
886 vectors for functional analysis of toxic and highly regulated genes in *Pseudomonas*  
887 and *Burkholderia* spp. and other bacteria. *Applied and environmental microbiology*  
888 74(23):7422-7426.
- 889 36. Gao P, *et al.* (2020) oprC Impairs Host Defense by Increasing the Quorum-Sensing-  
890 Mediated Virulence of *Pseudomonas aeruginosa*. *Frontiers in immunology* 11:1696.
- 891 37. Abdollahi S, Rasooli I, & Mousavi Gargari SL (2018) The role of TonB-dependent  
892 copper receptor in virulence of *Acinetobacter baumannii*. *Infection, genetics and*  
893 *evolution : journal of molecular epidemiology and evolutionary genetics in infectious*  
894 *diseases* 60:181-190.
- 895 38. Faham S, *et al.* (1997) Role of the active-site cysteine of *Pseudomonas aeruginosa*  
896 azurin. Crystal structure analysis of the Cull(Cys112Asp) protein. *JBIC Journal of*  
897 *Biological Inorganic Chemistry* 2(4):464-469.
- 898 39. Cascella M, Magistrato A, Tavernelli I, Carloni P, & Rothlisberger U (2006) Role of  
899 protein frame and solvent for the redox properties of azurin from *Pseudomonas*

- 900 aeruginosa. *Proceedings of the National Academy of Sciences of the United States of*  
901 *America* 103(52):19641-19646.
- 902 40. Xue Y, *et al.* (2008) Cu(I) recognition via cation- $\pi$  and methionine interactions in CusF.  
903 *Nature chemical biology* 4(2):107-109.
- 904 41. Ren F, *et al.* (2019) X-ray structures of the high-affinity copper transporter Ctr1. *Nature*  
905 *communications* 10(1):1386.
- 906 42. Stoyanov JV, Magnani D, & Solioz M (2003) Measurement of cytoplasmic copper,  
907 silver, and gold with a lux biosensor shows copper and silver, but not gold, efflux by  
908 the CopA ATPase of *Escherichia coli*. *FEBS letters* 546(2-3):391-394.
- 909 43. Flemming HC & Wingender J (2010) The biofilm matrix. *Nature reviews. Microbiology*  
910 8(9):623-633.
- 911 44. Kragh KN, *et al.* (2016) Role of Multicellular Aggregates in Biofilm Formation. *mBio*  
912 7(2):e00237.
- 913 45. Alvarez-Ortega C & Harwood CS (2007) Responses of *Pseudomonas aeruginosa* to  
914 low oxygen indicate that growth in the cystic fibrosis lung is by aerobic respiration.  
915 *Molecular microbiology* 65(1):153-165.
- 916 46. Hassett DJ, *et al.* (2009) *Pseudomonas aeruginosa* hypoxic or anaerobic biofilm  
917 infections within cystic fibrosis airways. *Trends in microbiology* 17(3):130-138.
- 918 47. Filiatrault MJ, *et al.* (2005) Effect of anaerobiosis and nitrate on gene expression in  
919 *Pseudomonas aeruginosa*. *Infection and immunity* 73(6):3764-3772.
- 920 48. Yoshihara E & Nakae T (1989) Identification of porins in the outer membrane of  
921 *Pseudomonas aeruginosa* that form small diffusion pores. *The Journal of biological*  
922 *chemistry* 264(11):6297-6301.
- 923 49. Ladomersky E & Petris MJ (2015) Copper tolerance and virulence in bacteria.  
924 *Metallomics : integrated biometal science* 7(6):957-964.
- 925 50. Thaden JT, Lory S, & Gardner TS (2010) Quorum-sensing regulation of a copper  
926 toxicity system in *Pseudomonas aeruginosa*. *Journal of bacteriology* 192(10):2557-  
927 2568.
- 928 51. Frangipani E, Slaveykova VI, Reimann C, & Haas D (2008) Adaptation of aerobically  
929 growing *Pseudomonas aeruginosa* to copper starvation. *Journal of bacteriology*  
930 190(20):6706-6717.
- 931 52. Calmettes C, *et al.* (2015) The molecular mechanism of Zinc acquisition by the  
932 neisserial outer-membrane transporter ZnuD. *Nature communications* 6:7996.
- 933 53. Lee HS, Hancock RE, & Ingraham JL (1989) Properties of a *Pseudomonas stutzeri*  
934 outer membrane channel-forming protein (NosA) required for production of copper-  
935 containing N<sub>2</sub>O reductase. *Journal of bacteriology* 171(4):2096-2100.

- 936 54. Lee HS, Abdelal AH, Clark MA, & Ingraham JL (1991) Molecular characterization of  
937 nosA, a Pseudomonas stutzeri gene encoding an outer membrane protein required to  
938 make copper-containing N<sub>2</sub>O reductase. *Journal of bacteriology* 173(17):5406-5413.
- 939 55. Mokhele K, Tang YJ, Clark MA, & Ingraham JL (1987) A Pseudomonas stutzeri outer  
940 membrane protein inserts copper into N<sub>2</sub>O reductase. *Journal of bacteriology*  
941 169(12):5721-5726.
- 942 56. Wunsch P, Herb M, Wieland H, Schiek UM, & Zumft WG (2003) Requirements for  
943 Cu(A) and Cu-S center assembly of nitrous oxide reductase deduced from complete  
944 periplasmic enzyme maturation in the nondenitrifier Pseudomonas putida. *Journal of*  
945 *bacteriology* 185(3):887-896.
- 946 57. Nikaido H (2003) Molecular basis of bacterial outer membrane permeability revisited.  
947 *Microbiology and molecular biology reviews : MMBR* 67(4):593-656.
- 948 58. Stover CK, *et al.* (2000) Complete genome sequence of Pseudomonas aeruginosa  
949 PAO1, an opportunistic pathogen. *Nature* 406(6799):959-964.
- 950 59. Guzman LM, Belin D, Carson MJ, & Beckwith J (1995) Tight regulation, modulation,  
951 and high-level expression by vectors containing the arabinose PBAD promoter.  
952 *Journal of bacteriology* 177(14):4121-4130.
- 953 60. Bagchi P, Morgan MT, Bacsa J, & Fahrni CJ (2013) Robust affinity standards for Cu(I)  
954 biochemistry. *Journal of the American Chemical Society* 135(49):18549-18559.
- 955 61. Winter G, Lobley CM, & Prince SM (2013) Decision making in xia2. *Acta*  
956 *crystallographica. Section D, Biological crystallography* 69(Pt 7):1260-1273.
- 957 62. Adams PD, *et al.* (2010) PHENIX: a comprehensive Python-based system for  
958 macromolecular structure solution. *Acta crystallographica. Section D, Biological*  
959 *crystallography* 66(Pt 2):213-221.
- 960 63. Emsley P, Lohkamp B, Scott WG, & Cowtan K (2010) Features and development of  
961 Coot. *Acta crystallographica. Section D, Biological crystallography* 66(Pt 4):486-501.
- 962 64. Zheng H, *et al.* (2014) Validation of metal-binding sites in macromolecular structures  
963 with the CheckMyMetal web server. *Nature protocols* 9(1):156-170.
- 964 65. Kabsch W (2010) Xds. *Acta crystallographica. Section D, Biological crystallography*  
965 66(Pt 2):125-132.
- 966 66. Karimov RR & Hartwig JF (2018) Transition-Metal-Catalyzed Selective  
967 Functionalization of C(sp<sup>3</sup>) -H Bonds in Natural Products. *Angewandte Chemie*  
968 57(16):4234-4241.
- 969 67. Hoover JL, *et al.* (2017) A Robust Pneumonia Model in Immunocompetent Rodents to  
970 Evaluate Antibacterial Efficacy against S. pneumoniae, H. influenzae, K. pneumoniae,  
971 P. aeruginosa or A. baumannii. *Journal of visualized experiments : JoVE* (119).



- 972 68. Peterson AC, Russell JD, Bailey DJ, Westphall MS, & Coon JJ (2012) Parallel reaction  
973 monitoring for high resolution and high mass accuracy quantitative, targeted  
974 proteomics. *Molecular & cellular proteomics : MCP* 11(11):1475-1488.
- 975 69. Ahrne E, *et al.* (2016) Evaluation and Improvement of Quantification Accuracy in  
976 Isobaric Mass Tag-Based Protein Quantification Experiments. *Journal of proteome*  
977 *research* 15(8):2537-2547.
- 978  
979  
980  
981  
982  
983  
984  
985  
986  
987  
988  
989  
990  
991  
992  
993  
994  
995  
996  
997  
998  
999  
1000  
1001  
1002  
1003  
1004  
1005  
1006  
1007

1008  
1009  
1010  
1011

## Supporting Information

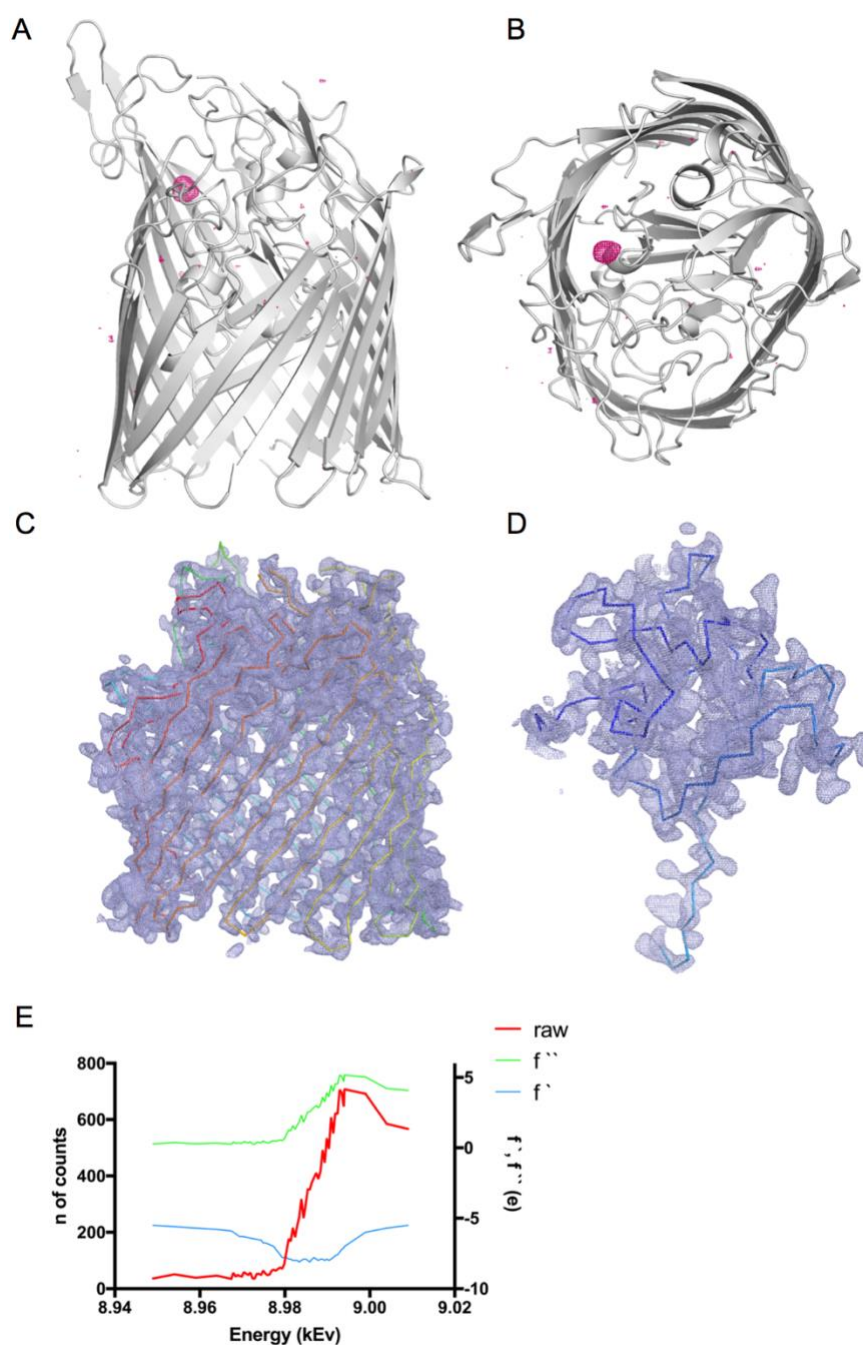

1012  
1013  
1014  
1015  
1016  
1017  
1018

Figure S1. Anomalous data for the OprC<sub>WT</sub> Cu-SAD experiment. (A, B) Copper anomalous maps (coloured magenta) contoured at  $4 \sigma$  (carve = 30). Experimental density for one OprC protomer after density modification (but before model building) for (C) barrel and (D) N-terminal plug domain (map contoured at  $1.5 \sigma$ , carve = 2.0). Ribbon is shown for orientation purposes. (E) X-ray fluorescence spectrum showing the copper-specific energy peak.

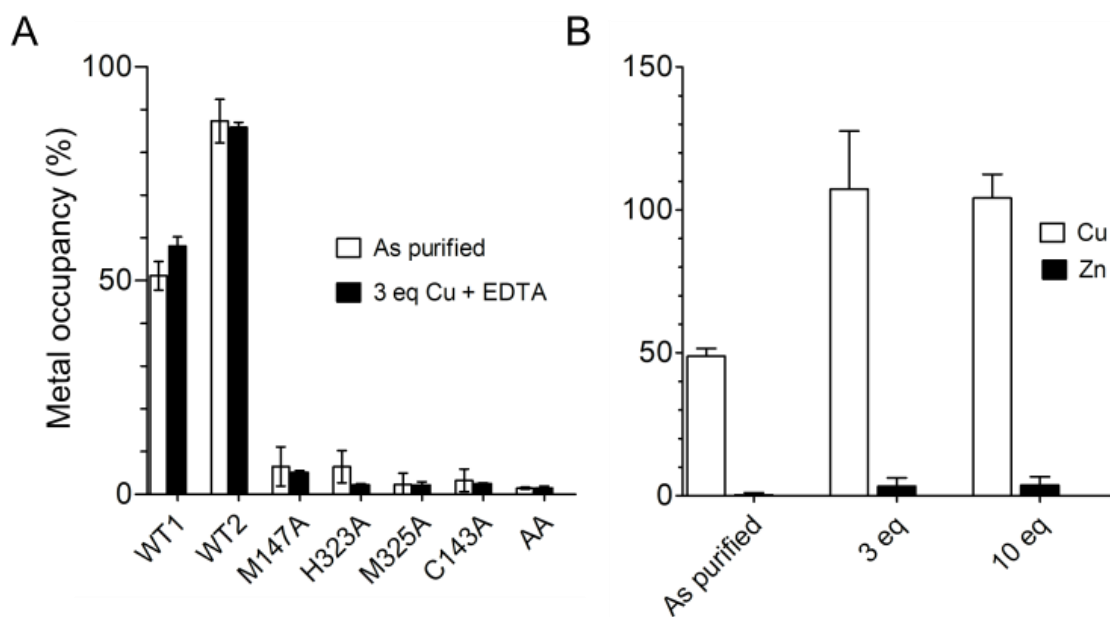

1019  
1020  
1021  
1022  
1023  
1024  
1025

Figure S2. ICP-MS data of OprC and mutant proteins. (A) Metal occupancy of OprC and mutant proteins after incubation with 3 equivalents copper in the presence of 0.5 mM EDTA (~50-fold excess) followed by analytical size exclusion chromatography and subsequent metal analysis by ICP-MS. (B) Metal occupancy of OprC WT after incubation with 3 or 10 Eq. of Cu or Zn.

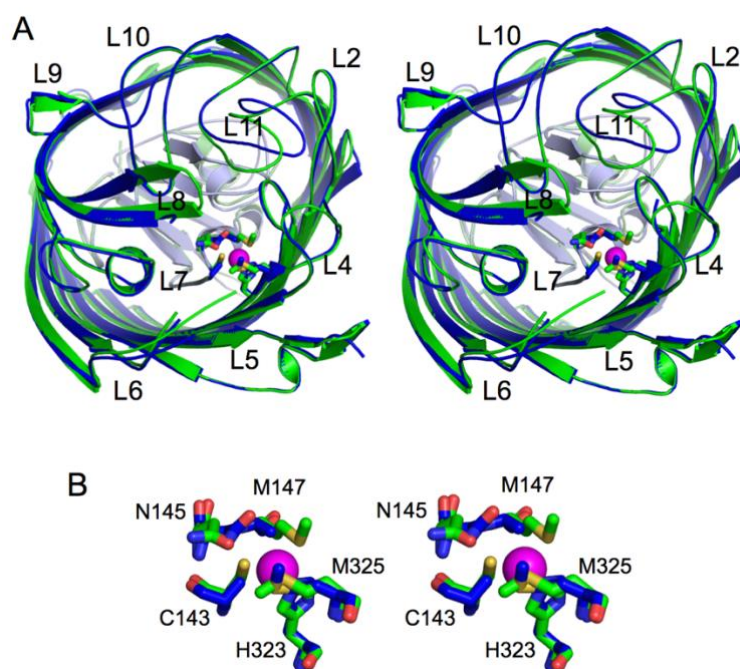

1026  
1027  
1028  
1029  
1030  
1031  
1032  
1033  
1034  
1035  
1036

Figure S3. Stereo 3D representation of superposed OprC (coloured green) and OprC<sub>AA</sub> (blue). (A) Extracellular view showing loops 2, 4, 5, 6, 7, 8, 9, 10, 11 (L2, L4, L5, L6, L7, L8, L9, L10, L11). Conformational changes are observed for external loops L8 and L11. (B) Active site view illustrating superposed residues involved in metal coordination for wild type OprC (green sticks) and OprC<sub>AA</sub> (blue sticks). Asn145 (N145) is also shown due to its role in shielding the active site. Oxygen atoms in amino acid residues are coloured red, nitrogens blue and sulphurs yellow. Copper atom is represented as a magenta sphere.

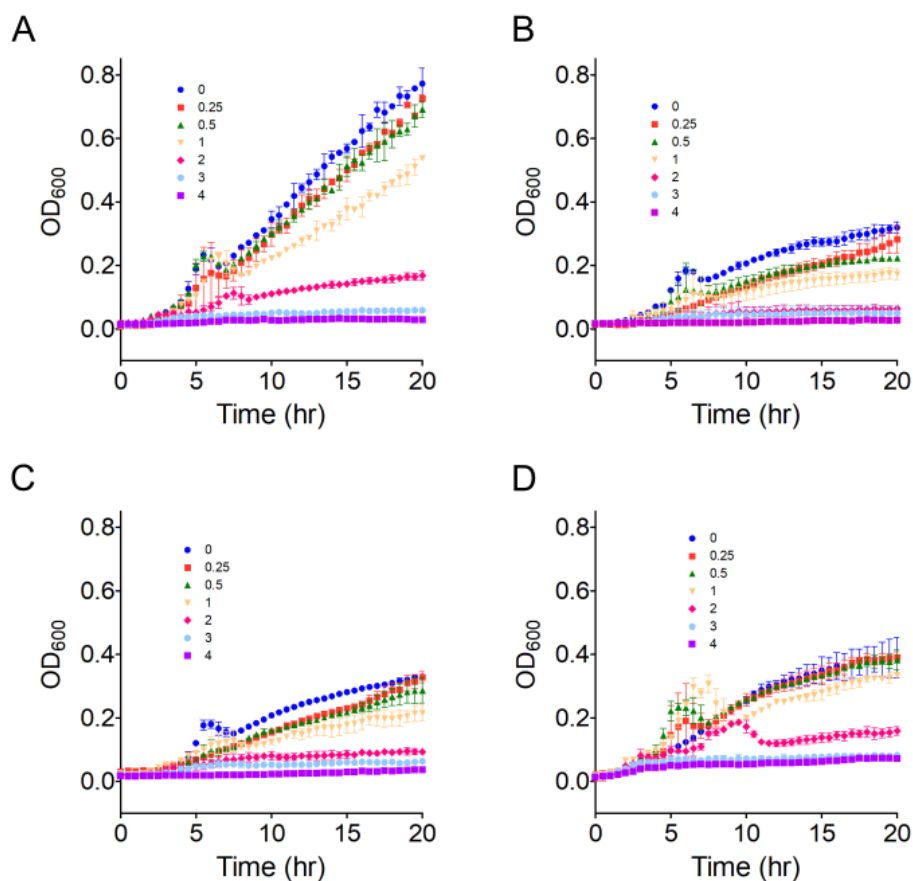

1037  
1038 Figure S4. Copper toxicity in *P. aeruginosa* overexpressing OprC. Anaerobic growth of (A)  
1039 pHERD30 and pHERD30-overexpressed (B) OprC<sub>WT</sub>, (C) OprC<sub>C143A</sub> and (D) OprC<sub>AA</sub> in PA14  
1040  $\Delta oprC$  was monitored during copper stress in rich media supplemented with 100 mM sodium  
1041 nitrate. Overexpression was induced with 0.1 % arabinose. Values indicate externally added  
1042 copper in mM.  
1043

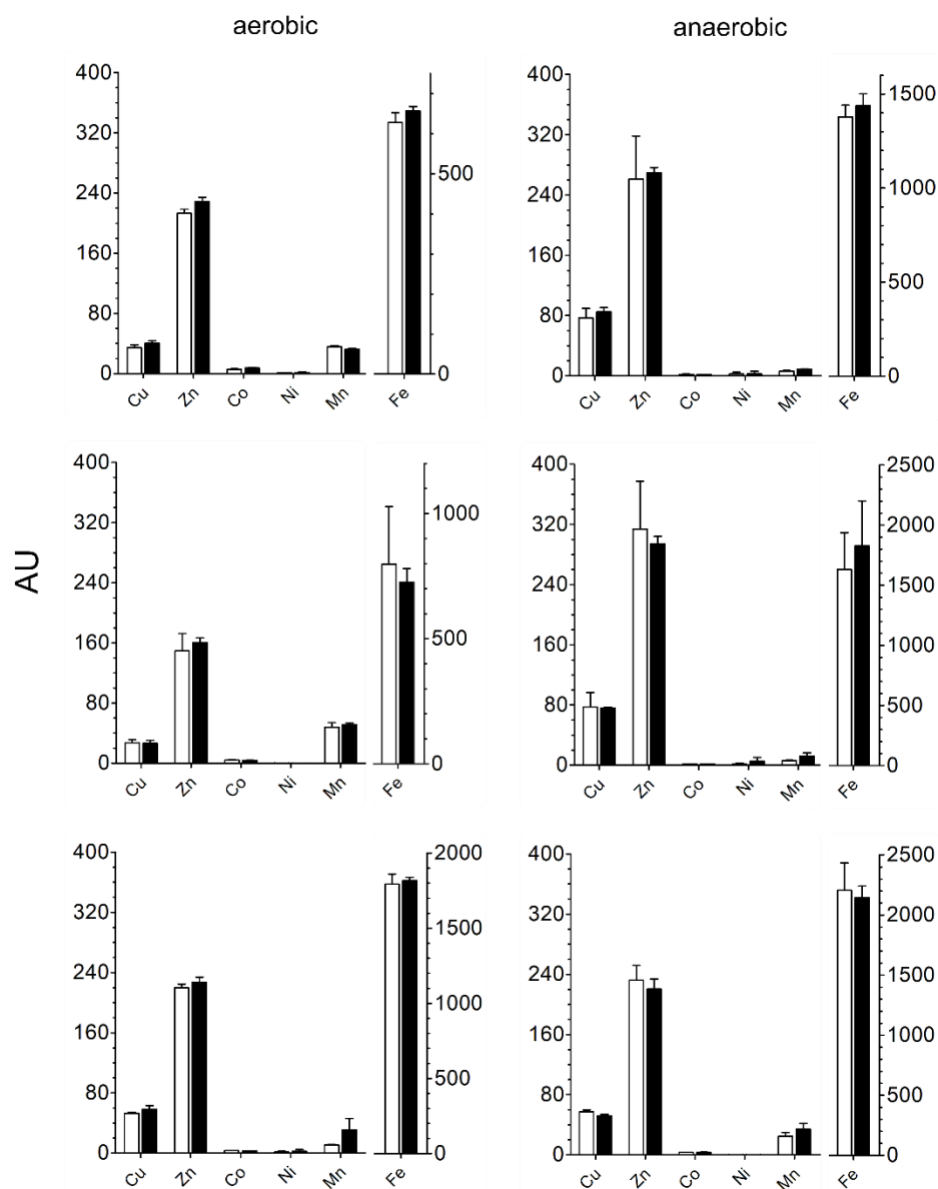

1044  
1045  
1046  
1047  
1048  
1049  
1050  
1051

Figure S5. Whole cell metal content of PA14 WT and PA14  $\Delta oprC$  analysed via ICP-MS. Cell-associated metal content was determined in cells grown in rich media supplemented with 100 mM sodium nitrate under both aerobic (left panels) and anaerobic conditions (right panels) without added copper. The three biological replicates have been plotted separately due to the different absolute metal contents. Reported values are averages  $\pm$  s.d. (n = 3).



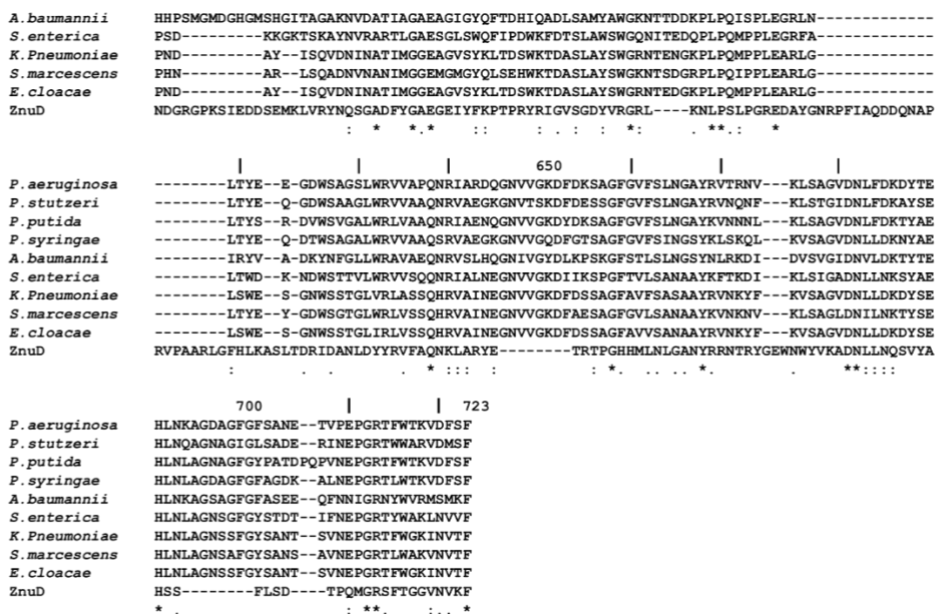

1053  
1054 Figure S6. Amino acid sequence alignment for mature OprC sequences from *Pseudomonas*  
1055 *aeruginosa* (uniprot ID G3XD89), NosA from *P. stutzeri* (uniprot ID Q00620), *P. putida* (uniprot  
1056 ID Q88D17), *P. syringae* (uniprot ID A0A085VGG7), *Acinetobacter baumannii* (uniprot ID  
1057 A0A0G4QL30), *Salmonella enterica* (uniprot ID A0A505CFK3), *Klebsiella pneumonia* (uniprot  
1058 ID A0A486MDQ0), *Serratia marcescens* (uniprot ID A0A221DQ80) and *Enterobacter cloacae*  
1059 (uniprot ID A0A1S6XXV6), showing high conservation of the binding site residues Cys143  
1060 (highlighted in yellow), Met147 and Met325 (green) and His323 (cyan). Methionine track  
1061 residues are depicted in red, and those located in the N-terminal plug are coloured magenta.  
1062 The TonB box sequence is depicted in blue. The zinc transporter ZnuD from *Neisseria*  
1063 *meningitidis* (uniprot ID Q9JZN9) is shown for comparison. Numbering is for the full-length *P.*  
1064 *aeruginosa* OprC sequence. Clustal scoring is indicated below the alignment.  
1065



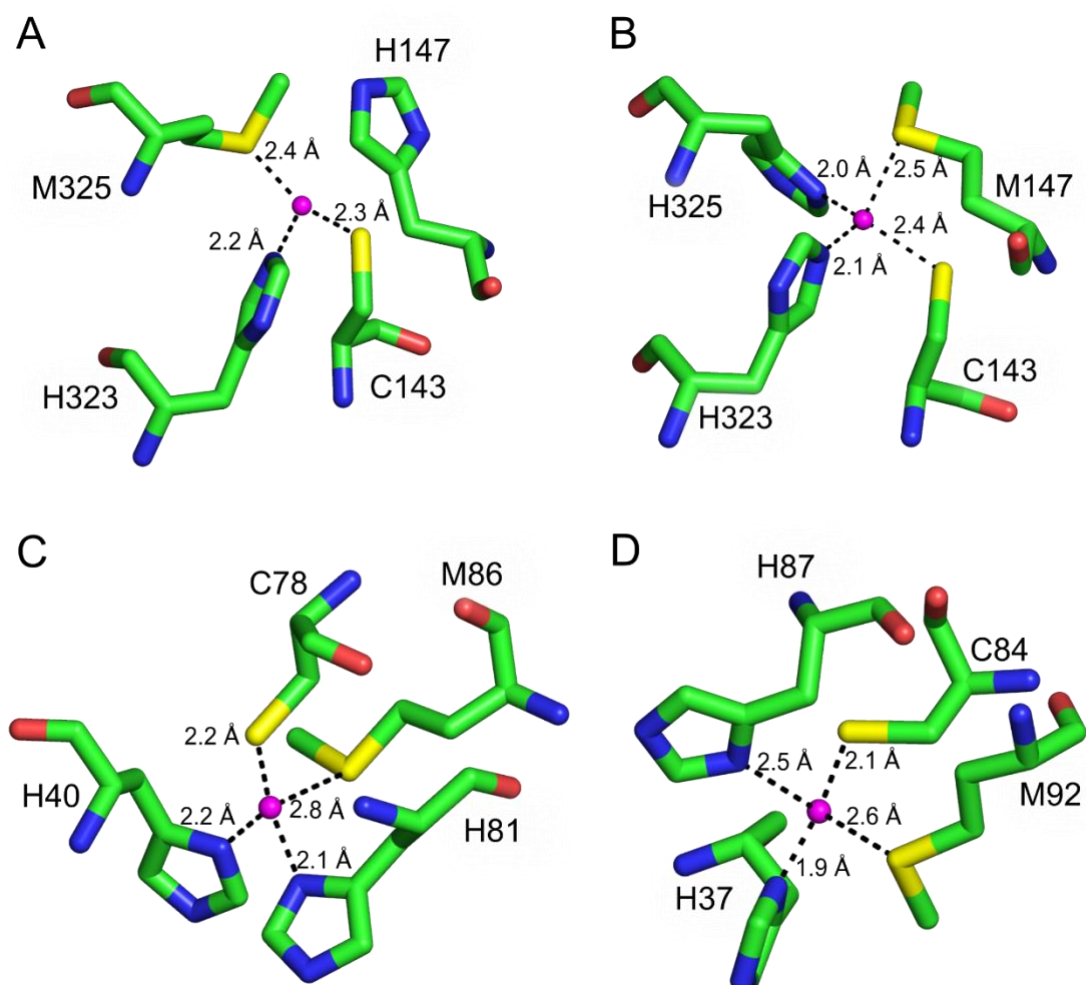

1066

| Bond distances (Å)  | Pseudoazurin (1PAZ) | Plastocyanin (4DPA) Cu (I) | Plastocyanin (4DP9) Cu (II) | M147H           | M325H         |
|---------------------|---------------------|----------------------------|-----------------------------|-----------------|---------------|
| Cys                 | 2.16 (Cys78)        | 2.15 (Cys84)               | 2.16 (Cys84)                | 2.32 (Cys143)   | 2.43 (Cys143) |
| Met                 | 2.76 (Met86)        | 2.62 (Met92)               | 2.78 (Met92)                | 2.40 (Met325)   | 2.5 (Met147)  |
| His                 | 2.16 (His40)        | 1.91 (His37)               | 1.94 (His37)                | 2.16 (His323)   | 2.08 (His323) |
| His                 | 2.12 (His81)        | 2.54 (His87)               | 1.99 (His87)                | - (M147H)       | 1.99 (Met325) |
| <b>Geometry (*)</b> | Tetrahedral         | Tetrahedral                | Tetrahedral                 | Trigonal planar | Tetrahedral   |

1067 (\*) Confirmed by the CheckMyMetal server (Zheng et al, 2014)

1068

1069 Figure S7. Comparison of M147H and M325H binding site residues with pseudoazurin and  
 1070 plastocyanin. Close up views of copper binding site residues in (A) M147H, (B) M325H, (C)  
 1071 pseudoazurin (PDB ID 1PAZ) and (D) plastocyanin (PDB ID 4DPA). The bound form of copper  
 1072 is Cu (I). Distances between coordinating residues and metal (magenta) are shown. The Table  
 1073 summarises distances between copper and co-ordinating residues as well as geometry.  
 1074

1075

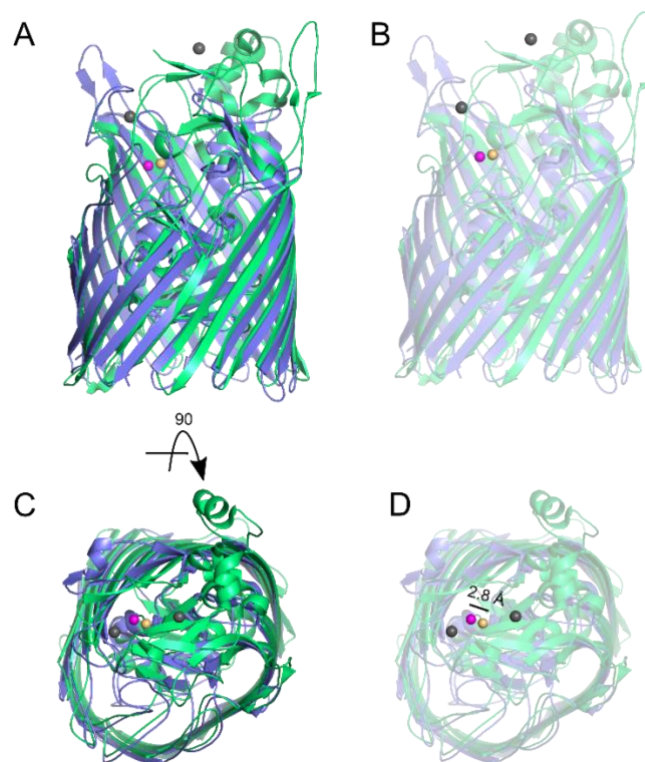

1076  
1077  
1078  
1079  
1080  
1081  
1082  
1083  
1084  
1085  
1086  
1087  
1088  
1089  
1090

Figure S8. Differences between OprC and the Zn-specific ZnuD. (A, C) Cartoon representation comparing Cu-loaded OprC (coloured blue, copper atom shown as magenta sphere) and the locked version of ZnuD (coloured green, 2 cadmium atoms bound to low affinity sites represented as grey spheres, zinc bound to the high affinity site represented in orange; PDB ID 4RDR). The locked conformation of ZnuD shows low-affinity metal sites at external loops, at regions similar to the methionine track (L5) from OprC. (B, D) Transparent view of the secondary structures illustrates the similar topological location for the high affinity metal sites (distance of 2.8 Å).

1091 Table S1. Data collection and refinement statistics for OprC variants with and without copper.

|                                                         | Cu - OprC        | OprC <sub>AA</sub> | Cu - C143A<br>8800              | Cu - C143A<br>9175              | H323A - Cu<br>8800             | H323A - Cu<br>9175             |
|---------------------------------------------------------|------------------|--------------------|---------------------------------|---------------------------------|--------------------------------|--------------------------------|
| <b>Data collection<sup>#</sup></b>                      |                  |                    |                                 |                                 |                                |                                |
| Space group                                             | C 2 2 21         | P2 21 21           | P 2 21 21                       | P 2 21 21                       | P 1 21 1                       | P 1 21 1                       |
| Cell dimensions                                         |                  |                    |                                 |                                 |                                |                                |
| <i>a</i> , <i>b</i> , <i>c</i> (Å)                      | 156, 197,<br>166 | 62, 171, 198       | 171, 198, 67                    | 171, 198, 67                    | 67,198, 172                    | 67, 197, 172                   |
| $\alpha$ , $\beta$ , $\gamma$ (°)                       | 90, 90, 90       | 90, 90, 90         | 90, 90, 90                      | 90, 90, 90                      | 90, 89, 90                     | 90, 91, 90                     |
| Resolution (Å)                                          | 84.67 - 1.97     | 98.02 - 2.77       | 198.04 -2.78<br>(2.83 - 2.78) * | 129.57 -2.56<br>(2.60 - 2.56) * | 197.67 -2.95<br>(3.00 -2.95) * | 197.27 -2.73<br>(2.78 -2.73) * |
| <i>R</i> <sub>pim</sub>                                 | 0.062(0.842)     | 0.041 (0.748)      | 0.078 (1.019)                   | 0.096 (2.48)                    | 0.081 (0.554)                  | 0.056 (0.577)                  |
| <i>I</i> / $\sigma$ <i>I</i>                            | 15.8 (1.3)       | 4.4 (1.6)          | 5.52 (0.39)                     | 5.40 (0.35)                     | 5.56 (0.58)                    | 7.82 (0.57)                    |
| <i>CC</i> <sub>1/2</sub>                                | 0.981 (0.784)    | 0.990 (0.56)       | 0.994 (0.400)                   | 0.974 (0.338)                   | 0.992(0.551)                   | 0.997 (0.674)                  |
| Completeness (%)                                        | 99.5(100)        | 88.8 (71.1)        | 100(100)                        | 100(100)                        | 100(100)                       | 100(100)                       |
| Redundancy                                              | 25.4 (25.4)      | 5.7 (5.5)          | 12.7 (12.1)                     | 12.3(12.3)                      | 6.6(6.2)                       | 6.6 (6.4)                      |
| <b>Refinement</b>                                       |                  |                    |                                 |                                 |                                |                                |
| Resolution (Å)                                          | 84.67 - 1.97     | 48.67 - 2.9        | 64.66 - 2.78                    | 67.02 - 2.56                    | 64.81-2.95                     | 64.84 - 2.73                   |
| No. reflections                                         | 178812           | 42223              | 58104                           | 74371                           | 93985                          | 118703                         |
| <i>R</i> <sub>work</sub> / <i>R</i> <sub>free</sub> (%) | 21/ 23.2         | 21.6 / 27.1        | 20.9/26.7                       | 24/29.8                         | 24.2 /30.3                     | 21.7 / 26.7                    |
| No. atoms                                               |                  |                    |                                 |                                 |                                |                                |
| Protein                                                 | 10050            | 10058              | 10119                           | 10148                           | 20154                          | 20221                          |
| Water                                                   | 556              | -                  | 23                              | 39                              | -                              | 67                             |
| <i>B</i> -factors                                       |                  |                    |                                 |                                 |                                |                                |
| Protein                                                 | 49.27            | 50.16              | 70                              | 72                              | 67                             | 64                             |
| Water                                                   | 49.28            | -                  | 54                              | 60                              | -                              | 54                             |
| R.m.s. deviations                                       |                  |                    |                                 |                                 |                                |                                |
| Bond lengths (Å)                                        | 0.008            | 0.010              | 0.009                           | 0.008                           | 0.009                          | 0.010                          |
| Bond angles (°)                                         | 1.26             | 1.54               | 1.12                            | 1.08                            | 1.17                           | 1.15                           |

<sup>#</sup> One crystal was used for each data collection.

\* Values in parentheses are for highest-resolution shell.

1092  
1093  
1094  
1095

1096 Table S2. Data collection and refinement statistics for OprC variants with silver.

|                                                         | Ag – OprC<br>8000 eV             | Ag – C143A<br>8800 eV            | Ag – C143A<br>9175 eV           | Ag – H323A<br>8800 eV           | Ag – H323A<br>9175 eV           |
|---------------------------------------------------------|----------------------------------|----------------------------------|---------------------------------|---------------------------------|---------------------------------|
| <b>Data collection<sup>#</sup></b>                      |                                  |                                  |                                 |                                 |                                 |
| Space group                                             | C 2 2 2 1                        | C 2 2 2 1                        | C 2 2 2 1                       | C 2 2 2 1                       | C 2 2 2 1                       |
| Cell dimensions                                         |                                  |                                  |                                 |                                 |                                 |
| <i>a</i> , <i>b</i> , <i>c</i> (Å)                      | 156, 195, 167                    | 154, 195, 165                    | 155, 196, 166                   | 156, 196, 166                   | 155, 196, 165                   |
| $\alpha$ , $\beta$ , $\gamma$ (°)                       | 90, 90, 90                       | 90, 90, 90                       | 90, 90, 90                      | 90, 90, 90                      | 90, 90, 90                      |
| Resolution (Å)                                          | 121.98 - 2.71<br>(2.76 - 2.71) * | 165.47 - 2.60<br>(2.64 - 2.60) * | 84.18 - 2.68<br>(2.73 - 2.68) * | 70.41 - 2.86<br>(2.91 - 2.86) * | 63.14 - 2.61<br>(2.66 - 2.61) * |
| <i>R</i> <sub>pim</sub>                                 | 0.028 (0.503)                    | 0.055 ( 0.630)                   | 0.056 (0.654)                   | 0.207 ( 3.005)                  | 0.182 (2.940)                   |
| <i>I</i> / $\sigma$ <i>I</i>                            | 20.12 (1.47)                     | 7.56 (1.11)                      | 7.64 (1.09)                     | 4.18 (0.34)                     | 5.00 (0.43)                     |
| <i>CC</i> <sub>1/2</sub>                                | 0.999 (0.653)                    | 0.992 (0.644)                    | 0.996 (0.575)                   | 0.992 (0.284)                   | 0.993 (0.317)                   |
| Completeness (%)                                        | 99.9(100)                        | 99.9(97.6)                       | 99.9(96.7)                      | 98.2(97)                        | 98(96.9)                        |
| Redundancy                                              | 35.5 (31.6)                      | 13.5 (13.8)                      | 13.5(13.9)                      | 13.1 (13.5)                     | 13.3(13.6)                      |
| <b>Refinement</b>                                       |                                  |                                  |                                 |                                 |                                 |
| Resolution (Å)                                          | 97.64 - 2.71                     | 82.74 - 2.6                      | 82.81 - 2.68                    | 70.41 - 2.86                    | 60.78 - 2.61                    |
| No. reflections                                         | 69472                            | 76648                            | 70402                           | 54313                           | 73192                           |
| <i>R</i> <sub>work</sub> / <i>R</i> <sub>free</sub> (%) | 21.6 / 25.4                      | 22.2 / 26.1                      | 21.4 / 25.2                     | 20.7 / 27.2                     | 21.4 / 27.4                     |
| No. atoms                                               |                                  |                                  |                                 |                                 |                                 |
| Protein                                                 | 10054                            | 10156                            | 10182                           | 10073                           | 10112                           |
| Water                                                   | 13                               | 13                               | 8                               | -                               | 71                              |
| <i>B</i> -factors                                       |                                  |                                  |                                 |                                 |                                 |
| Protein                                                 | 79                               | 72                               | 72                              | 69                              | 61                              |
| Water                                                   | 63                               | 57                               | 60                              | -                               | 52                              |
| R.m.s. deviations                                       |                                  |                                  |                                 |                                 |                                 |
| Bond lengths (Å)                                        | 0.008                            | 0.008                            | 0.009                           | 0.009                           | 0.008                           |
| Bond angles (°)                                         | 1.06                             | 1.08                             | 1.12                            | 1.2                             | 1.04                            |

1097 <sup>#</sup> One crystal was used for each data collection.

1098 \* Values in parentheses are for highest-resolution shell.

1099

1100 Table S3. Data collection and refinement statistics for M147H and M325H variants.  
1101

|                                                         | Cu – M147H<br>9175 eV           | Cu – M325H<br>9175 eV           |
|---------------------------------------------------------|---------------------------------|---------------------------------|
| <b>Data collection<sup>#</sup></b>                      |                                 |                                 |
| Space group                                             | C 2 2 21                        | C 2 2 21                        |
| Cell dimensions                                         |                                 |                                 |
| <i>a, b, c</i> (Å)                                      | 155, 197, 165                   | 156, 196, 167                   |
| $\alpha, \beta, \gamma$ (°)                             | 90, 90, 90                      | 90, 90, 90                      |
| Resolution (Å)                                          | 98.09 - 2.38<br>(2.42 - 2.38) * | 97.85 - 2.37<br>(2.41 - 2.37) * |
| <i>R</i> <sub>pim</sub>                                 | 0.044 (1.056)                   | 0.044 (1.255)                   |
| <i>I</i> / $\sigma$ <i>I</i>                            | 11.71 (0.89)                    | 12.46 (1.00)                    |
| <i>CC</i> <sub>1/2</sub>                                | 0.996 (0.321)                   | 0.997(0.315)                    |
| Completeness (%)                                        | 100 (100)                       | 100(100)                        |
| Redundancy                                              | 13.6 (13.2)                     | 13.3(13.5)                      |
| <b>Refinement</b>                                       |                                 |                                 |
| Resolution (Å)                                          | 63.34 - 2.38                    | 61.02 - 2.37                    |
| No. reflections                                         | 101122                          | 103039                          |
| <i>R</i> <sub>work</sub> / <i>R</i> <sub>free</sub> (%) | 21.8/ 25.3                      | 21.9/ 25.2                      |
| No. atoms                                               |                                 |                                 |
| Protein                                                 | 10158                           | 10164                           |
| Water                                                   | 133                             | 107                             |
| <i>B</i> -factors                                       |                                 |                                 |
| Protein                                                 | 65                              | 66                              |
| Water                                                   | 57                              | 28                              |
| R.m.s. deviations                                       |                                 |                                 |
| Bond lengths (Å)                                        | 0.009                           | 0.008                           |
| Bond angles (°)                                         | 1                               | 0.99                            |

1102 <sup>#</sup> One crystal was used for each data collection.

1103 \* Values in parentheses are for highest-resolution shell.

1104

1105

1106

1107

1108

1109
